# Supplementary material for: Systematic morphological and morphometric analysis of identified olfactory receptor neurons in Drosophila melanogaster
Source: eLife. 2021 Aug 23;10:e69896. doi: 10.7554/eLife.69896 (PMC8410077; doi:10.7554/eLife.69896)
Supplement: Figure 1—source data 1. [file elife-69896-fig1-data1.xlsx]

## Sheet: Or7a
Object Number	Sensilla Type	Number of ORNs	Sensillum Volume (um3)	Sensillum Surface Area (um2)	Diameter of Sensillum Basal Attachment (um)	ORN Model Segmented	Cuticle Volume Model Segmented	Cuticle Length Model Analyzed	Other Models
1	T1	1	Incomplete Segmentation	Incomplete Segmentation	Incomplete Segmentation	NONE	NONE	NONE	*ab1Model1Morphometrics.mod has no associated cuticle object
2	T1	1	Incomplete Segmentation	Incomplete Segmentation	Incomplete Segmentation	NONE	NONE	NONE	*ab1Model2Morphometrics.mod has no associated cuticle object
3	T1	1	Incomplete Segmentation	Incomplete Segmentation	Incomplete Segmentation	NONE	NONE	NONE	*abx(1)Model2Morphometrics.mod has no associated cuticle object
4	T1	1	Incomplete Segmentation	Incomplete Segmentation	Incomplete Segmentation	NONE	NONE	NONE
5	C	2	11.365	Incomplete Segmentation	3.84088	NONE	NONE	NONE		.
6	C	2	8.55905	37.7303	3.59693	NONE	NONE	NONE
7	C	2	9.1477	39.0485	3.48521	NONE	NONE	NONE
8	C	2	8.71497	35.6292	3.46978	NONE	NONE	NONE
9	C	2	9.12211	38.7431	3.49352	NONE	NONE	NONE
10	C	2	8.72939	38.0705	3.15961	NONE	NONE	NONE
11	C	2	6.91386	32.8863	3.40079	NONE	NONE	NONE
12	C	2	8.33428	35.4803	3.26454	NONE	NONE	NONE
13	C	2	8.69202	35.1714	3.33797	NONE	NONE	NONE
14	B	2	13.6827	47.2038	2.81837	NONE	NONE	NONE
15	B	2	12.353	41.3839	2.80957	NONE	NONE	NONE
16	B	2	13.5922	45.5315	3.02125	NONE	NONE	NONE
17	B	2	16.0559	50.4791	3.10896	NONE	NONE	NONE
18	B	2	12.7521	43.7549	3.03363	NONE	NONE	NONE
19	B	2	13.8683	47.285	3.05128	NONE	NONE	NONE
20	B	2	14.1244	42.677	3.17505	NONE	NONE	NONE
21	B	2	13.456	45.5657	3.2531	NONE	NONE	NONE
22	B	2	17.5998	54.5026	3.31986	NONE	NONE	NONE
23	B	2	20.7984	59.6944	3.00104	NONE	NONE	NONE
24	Bx(1)	1	14.8451	47.5726	2.71777	abx(1)Model1Morphometrics.mod	abx(1)Model1CuticleVolume.mod	abx(1)Model1CuticleLength.mod
25	B	2	17.7565	52.4117	2.93796	NONE	NONE	NONE
26	B	2	16.1369	49.4831	3.27133	NONE	NONE	NONE
27	B	2	14.3515	44.4132	3.22334	NONE	NONE	NONE
28	B	2	16.2862	52.6361	3.2199	NONE	NONE	NONE
29	B	2	17.2449	53.6744	3.29876	NONE	NONE	NONE
30	B	2	16.0276	48.8236	3.17309	NONE	NONE	NONE
31	B	2	14.5118	46.6505	3.37621	NONE	NONE	NONE
32	B4	2	20.3979	58.7528	2.96281	ab4Model3Morphometrics.mod	ab4Model3CuticleVolume.mod	ab4Model3CuticleLength.mod
33	B	2	21.0064	58.8404	3.10023	NONE	NONE	NONE
34	B	2	15.8273	48.881	3.21578	NONE	NONE	NONE
35	LB	2	29.8315	71.9193	3.15309	ab2Model1Morphometrics.mod	ab2Model1CuticleVolume.mod	ab2Model1CuticleLength.mod
36	B	2	21.7527	63.752	3.39075	NONE	NONE	NONE
37	B	0	15.0025	49.2215	3.56176	NONE	EmtpyBasiconicCuticleVolume.mod	EmptyBasiconicCutilcleLength.mod
38	LB	INC	33.4966	78.4523	3.32738	NONE	NONE	NONE
39	LB	2	27.8385	70.03	3.11742	NONE	NONE	NONE
40	B4	2	20.6377	61.5777	3.6625	ab4Model2Morphometrics.mod	ab4Model2CuticleVolume.mod	ab4Model2CuticleLength.mod
41	B	2	16.3044	49.7843	3.27955	NONE	NONE	NONE
42	LB	INC	29.3791	69.2544	2.88828	NONE	NONE	NONE
43	B4	2	23.9791	68.6497	4.11528	ab4Model1Morphometrics.mod	ab4Model1CuticleVolume.mod	ab4Model1CuticleLength.mod
44	B	2	22.5635	61.4414	3.43437	NONE	NONE	NONE
45	B	2	27.3872	67.372	3.52606	NONE	NONE	NONE
46	LB	2	32.7307	79.2071	3.2087	NONE	NONE	NONE
47	B1	4	35.2032	79.6854	3.39362	NONE	ab1Cuticle1Volume.mod	ab1Cuticle1Length.mod
48	LB	2	35.4525	80.1637	4.1823	NONE	NONE	NONE
49	BX(3)	3	36.1042	80.0527	3.46867	abx(3)Model1Morphometrics.mod	abx(3)Model1CuticleVolume.mod	abx(3)Model1CuticleLength.mod
50	B1	4	33.547	77.9389	3.23896	NONE	ab1Cuticle2Volume.mod	ab1Cuticle2Length.mod
51	BX(3)	3	36.5516	79.7491	3.6801	NONE	NONE	NONE
52	B	2	12.3966	42.9741	3.14883	NONE	NONE	NONE
53	B	2	11.4897	39.2652	2.83075	NONE	NONE	NONE

## Sheet: Or22a
Object Number	Sensilla Type	Number of ORNs	Sensillum Volume (um3)	Sensillum Surface Area (um2)	Diameter of Sensillum Basal Attachment (um)	ORN Model Segmented	Cuticle Volume Model Segmented	Cuticle Length Model Analyzed
1	C	2	Incomplete Segmentation	Incomplete Segmentation	Incomplete Segmentation	NONE	NONE	NONE
2	B	2	Incomplete Segmentation	Incomplete Segmentation	Incomplete Segmentation	NONE	NONE	NONE
3	B	?	Incomplete Segmentation	Incomplete Segmentation	Incomplete Segmentation	NONE	NONE	NONE
4	B1	4	42.6492	83.0608	4.12398	NONE	ab1Cuticle1Volume.mod	ab1Cuticle1Length.mod
5	B1	4	42.2258	Incomplete Segmentation	3.94271	NONE	ab1Cuticle2Volume.mod	ab1Cuticle2Length.mod
6	B1	4	43.8312	85.338	4.01206	NONE	ab1Cuticle3Volume.mod	ab1Cuticle3Length.mod
7	B2	2	33.2555	72.0143	3.28308	NONE	ab2Cuticle1Volume.mod	ab2Cuticle1Length.mod
8	B3	2	34.8151	86.7169	3.7081	NONE	ab3Cuticle1Volume.mod	ab3Cuticle1Length.mod
9	B3	2	32.962	81.7328	3.48167	ab3Model5Morphometrics.mod	ab3Model5CuticleVolume.mod	ab3Model5CutilceVolume.mod
10	B3	2	43.3744	105.023	3.73494	NONE	ab3Cuticle2Volume.mod	ab3Cuticle2Length.mod
11	B2	2	30.1566	68.3441	3.50276	NONE	ab2Cuticle2Volume.mod	ab2Cuticle2Length.mod
12	B3	2	39.1765	84.2969	3.66621	NONE	ab3Cuticle3Volume.mod	ab1Cuticle3Length.mod
13	B3	2	42.8903	96.7567	4.02832	NONE	ab3Cuticle4Volume.mod	ab3Cuticle4Length.mod
14	B3	2	39.8923	85.909	3.42087	NONE	ab3Cuticle5Volume.mod	ab3Cuticle5Length.mod
15	B3	2	38.0237	80.1969	3.36171	NONE	ab3Cuticle6Volume.mod	ab3Cuticle6Length.mod
16	B3	2	Incomplete Segmentation	Incomplete Segmentation	Incomplete Segmentation	NONE	NONE	NONE
17	B3	2	Incomplete Segmentation	Incomplete Segmentation	Incomplete Segmentation	NONE	NONE	NONE
18	B3	2	Incomplete Segmentation	Incomplete Segmentation	Incomplete Segmentation	NONE	NONE	NONE
19	B3	2	Incomplete Segmentation	Incomplete Segmentation	Incomplete Segmentation	ab3Model1Morphometrics.mod	ab3Model1CuticleVolume.mod	ab3Model1CuticleLength.mod
20	B3	2	Incomplete Segmentation	Incomplete Segmentation	Incomplete Segmentation	ab3Model4Morphometrics.mod	ab3Model4CuticleVolume.mod	ab3Model4CuticleLength.mod
21	B3	2	Incomplete Segmentation	Incomplete Segmentation	Incomplete Segmentation	ab3Model3Morphometrics.mod	ab3Model3CuticleVolume.mod	ab3Model3CuticleLength.mod
22	BX(3)	3	Incomplete Segmentation	Incomplete Segmentation	Incomplete Segmentation	abx(3)Model2Morphometrics.mod	abx(3)Model2CuticleVolume.mod	abx(3)Model2CuticleLength.mod
23	B3	2	Incomplete Segmentation	Incomplete Segmentation	Incomplete Segmentation	ab3Model2Morphometrics.mod	ab3Model2CuticleVolume.mod	ab3Model2CuticleLength.mod
24	B3	2	Incomplete Segmentation	Incomplete Segmentation	Incomplete Segmentation	NONE	NONE	NONE
25	B	2	Incomplete Segmentation	Incomplete Segmentation	Incomplete Segmentation	NONE	NONE	NONE
26	B2	2	39.5262	82.75	3.55794	NONE	ab2Cuticle3Volume.mod	ab2Cuticle3Length.mod
27	B3	2	Incomplete Segmentation	Incomplete Segmentation	Incomplete Segmentation	NONE	NONE	NONE
28	B3	2	Incomplete Segmentation	Incomplete Segmentation	Incomplete Segmentation	NONE	NONE	NONE
29	B	2	Incomplete Segmentation	Incomplete Segmentation	Incomplete Segmentation	NONE	NONE	NONE
30	B	2	Incomplete Segmentation	Incomplete Segmentation	Incomplete Segmentation	NONE	NONE	NONE
31	B	2	Incomplete Segmentation	Incomplete Segmentation	Incomplete Segmentation	NONE	NONE	NONE

## Sheet: Or47a
Object Number	Sensilla Type	Number of ORNs	Sensillum Volume (um3)	Sensillum Surface Area (um2)	Diameter of Sensillum Basal Attachment (um)	ORN Model Segmented	Cuticle Volume Model Segmented	Cuticle Length Model Analyzed
1	T1	1	Incomplete Segmentation	Incomplete Segmentation	Incomplete Segmentation	NONE	NONE	NONE
2	T2	2	Incomplete Segmentation	Incomplete Segmentation	Incomplete Segmentation	NONE	NONE	NONE
3	T3	3	Incomplete Segmentation	Incomplete Segmentation	Incomplete Segmentation	NONE	NONE	NONE
4	T1	1	Incomplete Segmentation	Incomplete Segmentation	Incomplete Segmentation	NONE	NONE	NONE
5	T1	1	Incomplete Segmentation	Incomplete Segmentation	Incomplete Segmentation	NONE	NONE	NONE
6	T1	1	Incomplete Segmentation	Incomplete Segmentation	Incomplete Segmentation	NONE	NONE	NONE
7	T1	1	Incomplete Segmentation	Incomplete Segmentation	Incomplete Segmentation	NONE	NONE	NONE
8	T1	1	44.1284	115.866	3.54404	NONE	T1Cuticle1Volume.mod	T1Cuticle1Length.mod
9	T1	1	Incomplete Segmentation	Incomplete Segmentation	Incomplete Segmentation	NONE	NONE	NONE
10	T1	1	Incomplete Segmentation	Incomplete Segmentation	Incomplete Segmentation	NONE	NONE	NONE
11	T1	1	Incomplete Segmentation	Incomplete Segmentation	Incomplete Segmentation	NONE	NONE	NONE
12	T1	1	Incomplete Segmentation	Incomplete Segmentation	Incomplete Segmentation	NONE	NONE	NONE
13	T1	1	Incomplete Segmentation	Incomplete Segmentation	Incomplete Segmentation	NONE	NONE	NONE
14	T2	2	Incomplete Segmentation	Incomplete Segmentation	Incomplete Segmentation	NONE	NONE	NONE
15	T2	2	42.4414	112.153	3.14353	NONE	T2Cuticle1Volume.mod	T2Cuticle1Length.mod
16	I2	2	Incomplete Segmentation	Incomplete Segmentation	Incomplete Segmentation	NONE	NONE	NONE
17	T2	2	Incomplete Segmentation	Incomplete Segmentation	Incomplete Segmentation	NONE	NONE	NONE
18	I2	2	Incomplete Segmentation	Incomplete Segmentation	Incomplete Segmentation	NONE	NONE	NONE
19	T2	2	Incomplete Segmentation	Incomplete Segmentation	Incomplete Segmentation	NONE	NONE	NONE
20	T2	2	Incomplete Segmentation	Incomplete Segmentation	Incomplete Segmentation	NONE	NONE	NONE
21	T2	2	Incomplete Segmentation	Incomplete Segmentation	Incomplete Segmentation	NONE	NONE	NONE
22	C	3	Incomplete Segmentation	Incomplete Segmentation	Incomplete Segmentation	NONE	NONE	NONE
23	C?	?	14.7018	47.6936	2.37321	NONE	NONE	NONE
24	C3	2	Incomplete Segmentation	Incomplete Segmentation	Incomplete Segmentation	NONE	NONE	NONE
25	C	3	8.93425	32.3059	3.5205	NONE	NONE	NONE
26	C	3	Incomplete Segmentation	Incomplete Segmentation	Incomplete Segmentation	NONE	NONE	NONE
27	C	3	Incomplete Segmentation	Incomplete Segmentation	Incomplete Segmentation	NONE	NONE	NONE
28	C	3	10.0954	35.4616	3.69464	NONE	NONE	NONE
29	C	3	11.5469	41.8596	3.91236	NONE	NONE	NONE
30	C	3	Incomplete Segmentation	Incomplete Segmentation	Incomplete Segmentation	NONE	NONE	NONE
31	C?	?	Unknown ID due to poor image quality	Unknown ID due to poor image quality	Unknown ID due to poor image quality	NONE	NONE	NONE
32	C	3	10.305	36.4862	3.88216	NONE	NONE	NONE
33	C	3	7.89885	31.3309	3.5841	NONE	NONE	NONE
34	C	3	Unknown ID due to poor image quality	Unknown ID due to poor image quality	Unknown ID due to poor image quality	NONE	NONE	NONE
35	T	0	Incomplete Segmentation	Incomplete Segmentation	Incomplete Segmentation	NONE	NONE	NONE
36	B	2	15.0947	49.1204	3.48996	NONE	NONE	NONE
37	B	2	12.8577	43.9508	3.47468	NONE	NONE	NONE
38	B5	2	11.985	41.3781	3.04087	NONE	ab5Cuticle1Volume.mod	ab5Cuticle1Length.mod
39	I3	3	15.467	50.7781	3.4603	NONE	ai3Cuticle1Volume.mod	ai3Cuticle1Length.mod
40	B5	2	13.0408	44.0418	3.28026	ab5Model2Morphometrics.mod	ab5Model2CuticleVolume.mod	ab5Model2CuticleLength.mod
41	I2	2	Incomplete Segmentation	Incomplete Segmentation	Incomplete Segmentation	NONE	NONE	NONE
42	B	2	Incomplete Segmentation	Incomplete Segmentation	Incomplete Segmentation	NONE	NONE	NONE
43	B	2	15.0233	44.5232	3.14052	NONE	NONE	NONE
44	B	2	13.9999	44.6431	3.02632	NONE	NONE	NONE
45	B	2	13.9323	43.9015	3.35553	NONE	NONE	NONE
46	B5	2	13.225	45.1798	3.23807	ab5Model4Morphometrics.mod	ab5Model4CuticleVolume.mod	ab5Model4CuticleLength.mod
47	T1	1	Incomplete Segmentation	Incomplete Segmentation	Incomplete Segmentation	T1Model5Morphometrics.mod	T1Model5CuticleVolume.mod	T1Model5CuticleLength.mod	T1Tormogencell.mod
48	B	2	16.5821	52.8864	3.62662	NONE	NONE	NONE
49	B5	2	14.8418	48.8807	3.28489	ab5Model3Morphometrics.mod	ab5Model3CuticleVolume.mod	ab5Model3CuticleLength.mod
50	I3	3	16.8048	53.7906	3.34955	NONE	ai3Cuticle2Volume.mod	ai3Cuticle2Length.mod
51	Bx(1)	1	14.8646	51.2352	3.56595	NONE	abx(1)Cuticle1Volume.mod	abx(1)Cuticle1Length.mod
52	B5	2	13.258	44.4511	2.95249	NONE	ab5Cuticle2Volume.mod	ab5Cuticle2Length.mod
53	I3	3	15.8515	53.9753	3.20751	NONE	ai3Cuticle3Volume.mod	ai3Cuticle3Length.mod
54	I3	3	Incomplete Segmentation	Incomplete Segmentation	Incomplete Segmentation	NONE	NONE	NONE
55	I3	3	Incomplete Segmentation	Incomplete Segmentation	Incomplete Segmentation	NONE	NONE	NONE
56	B5	2	14.168	45.1886	3.22111	NONE	ab5Cuticle3Volume.mod	ab5Cuticle3Length.mod
57	B	2	13.0324	44.2018	3.22426	NONE	NONE	NONE
58	B	2	Incomplete Segmentation	Incomplete Segmentation	Incomplete Segmentation	NONE	NONE	NONE
59	B	2	11.6217	39.624	2.90565	NONE	NONE	NONE
60	B5	2	13.3845	43.8887	3.29856	NONE	ab5Cuticle4Volume.mod	ab5Cuticle4Length.mod
61	B5	2	13.7983	46.043	3.31319	ab5Model1Morphometrics.mod	ab5Model1CuticleVolume.mod	ab5Model1CuticleLength.mod
62	I3	3	17.371	54.6466	3.38708	NONE	ai3Cuticle4Volume.mod	ai3Cuticle4Length.mod
63	B	2	14.2855	48.1451	3.58914	NONE	NONE	NONE
64	Bx(1)	1	Incomplete Segmentation	Incomplete Segmentation	Incomplete Segmentation	NONE	NONE	NONE
65	Bx(1)	1	Incomplete Segmentation	Incomplete Segmentation	Incomplete Segmentation	NONE	NONE	NONE
66	B	2	14.6603	44.8898	3.30393	NONE	NONE	NONE
67	B	2	15.0974	46.632	3.51157	NONE	NONE	NONE

## Sheet: Or47b Ant1
Object Number	Object Number	Sensilla Type	Number of ORNs	Sensillum Volume (um3)	Sensillum Surface Area (um2)	Diameter of Sensillum Basal Attachment (um)	ORN Model Segmented	Cuticle Volume Model Segmented	Cuticle Length Model Analyzed
1	T1	1	47.2639	120.03	3.46902	NONE	T1Cuticle1Volume.mod	T1Cuticle1Length.mod
2	T1	1	46.7403	121.549	3.50595	NONE	T1Cuticle2Volume.mod	T1Cuticle2Length.mod
3	T2	3	61.2694	138.077	3.93834	T2Model4Morphometrics.mod	T2Model4CuticleVolume.mod	T2Model4CuticleLength.mod
4	T3	3	58.8268	136.574	4.2517	NONE	T3Cuticle1Volume.mod	T3Cuticle1Length.mod
5	T2	2	62.142	Incomplete Segmentation	4.21975	T2Model3Morphometrics.mod	T2Model3CuticleVolume.mod	T2Model3CuticleLength.mod
6	T2	2	58.6183	135.364	3.95021	T2Model2Morphometrics.mod	T2Model2CuticleVolume.mod	T2Model2CuticleLength.mod
7	T1	1	Incomplete Segmentation	Incomplete Segmentation	Incomplete Segmentation	Incomplete Segmentation	Incomplete Segmentation	Incomplete Segmentation
8	T1	1	Incomplete Segmentation	Incomplete Segmentation	Incomplete Segmentation	NONE	NONE	NONE
9	T2	2	Incomplete Segmentation	Incomplete Segmentation	Incomplete Segmentation	NONE	NONE	NONE
10	T1	1	Incomplete Segmentation	Incomplete Segmentation	Incomplete Segmentation	NONE	NONE	NONE
11	T1	1	Incomplete Segmentation	Incomplete Segmentation	Incomplete Segmentation	NONE	NONE	NONE
12	T1	1	Incomplete Segmentation	Incomplete Segmentation	Incomplete Segmentation	NONE	NONE	NONE
13	T2	2	Incomplete Segmentation	Incomplete Segmentation	Incomplete Segmentation	NONE	NONE	NONE
14	T1	2	Incomplete Segmentation	Incomplete Segmentation	Incomplete Segmentation	NONE	NONE	NONE
15	T1	2	Incomplete Segmentation	Incomplete Segmentation	Incomplete Segmentation	NONE	NONE	NONE
16	T2	2	Incomplete Segmentation	Incomplete Segmentation	Incomplete Segmentation	NONE	NONE	NONE
17	T2	2	Incomplete Segmentation	Incomplete Segmentation	Incomplete Segmentation	NONE	NONE	NONE
18	T2	2	Incomplete Segmentation	Incomplete Segmentation	Incomplete Segmentation	NONE	NONE	NONE
19	T2	2	Incomplete Segmentation	Incomplete Segmentation	Incomplete Segmentation	NONE	NONE	NONE
20	T2	2	55.815	128.377	3.59712	T2Model1Morphometrics.mod	T2Model1CuticleVolume.mod	T2Model1CuticleLength.mod
21	T2	2	Incomplete Segmentation	Incomplete Segmentation	Incomplete Segmentation	NONE	NONE	NONE
22	T2	2	Incomplete Segmentation	Incomplete Segmentation	Incomplete Segmentation	NONE	NONE	NONE
23	T2	2	Incomplete Segmentation	Incomplete Segmentation	Incomplete Segmentation	NONE	NONE	NONE
24	T2	2	Incomplete Segmentation	Incomplete Segmentation	Incomplete Segmentation	NONE	NONE	NONE
25	T2	3	Incomplete Segmentation	Incomplete Segmentation	Incomplete Segmentation	NONE	NONE	NONE
26	T3	3	Incomplete Segmentation	Incomplete Segmentation	Incomplete Segmentation	NONE	NONE	NONE
27	T3	3	Incomplete Segmentation	Incomplete Segmentation	Incomplete Segmentation	NONE	NONE	NONE
28	T3	3	Incomplete Segmentation	Incomplete Segmentation	Incomplete Segmentation	NONE	NONE	NONE
29	T3	3	Incomplete Segmentation	Incomplete Segmentation	Incomplete Segmentation	Incomplete Segmentation	Incomplete Segmentation	Incomplete Segmentation
30	T3	3	Incomplete Segmentation	Incomplete Segmentation	Incomplete Segmentation	Incomplete Segmentation	Incomplete Segmentation	Incomplete Segmentation
31	C	3	7.70436	29.1535	3.54055	NONE	NONE	NONE
32	C	3	7.79035	29.0534	3.70027	NONE	NONE	NONE
33	C	3	10.6557	37.0002	3.25211	ac2/4Model3SpikeyMorphometrics.mod	ac4Model3CuticleVolume.mod	ac4Model3CuticleLength.mod
34	C	3	7.66185	31.6857	3.29844	NONE	NONE	NONE
35	C	2	8.58832	31.3268	3.45727	NONE	NONE	NONE
36	C	2	Unknown ID	Unknown ID	Incomplete Segmentation	NONE	NONE	NONE
37	C	2	7.44713	28.308	3.4302	NONE	NONE	NONE
38	C	4	9.23796	37.9159	3.97615	NONE	ac1Cuticle1Volume.mod	ac1Cuticle1Length.mod
39	C	4	10.5281	42.0736	4.28911	NONE	ac1Cuticle2Volume.mod	ac1Cuticle2Length.mod
40	C	4	9.14043	36.5616	4.32468	NONE	ac1Cuticle3Volume.mod	ac1Cuticle3Length.mod
41	C	4	10.5559	43.2188	4.69092	NONE	ac1Cuticle4Volume.mod	ac1Cuticle4Length.mod
42	C	4	9.96693	38.8393	4.1983	NONE	ac1Cuticle5Volume.mod	ac1Cuticle5Length.mod
43	C	4	Incomplete Segmentation	Incomplete Segmentation	Incomplete Segmentation	NONE	NONE	NONE
44	C	4	9.62457	37.1526	3.71253	NONE	ac1Cuticle6Volume.mod	ac1Cuticle6Length.mod
45	C	3	10.0231	39.0934	3.74029	NONE	NONE	NONE
46	C	4	11.6697	44.4256	4.63951	NONE	ac1Cuticle7Volume.mod	ac1Cuticle7Length.mod
47	C	3	8.42778	32.0999	3.43814	NONE	NONE	NONE
48	C	3	7.46576	32.608	3.16516	ac2/4Model4RoundedMorphometrics.mod	ac2Model4CuticleVolume.mod	ac2Model4CuticleVolume.mod
49	I3	3	20.4487	59.6165	3.58028	NONE	ai3Cuticle1Volume.mod	ai3Cuticle1Length.mod
50	T1	1	Incomplete Segmentation	Incomplete Segmentation	Incomplete Segmentation	NONE	NONE	NONE
51	T1	1	Incomplete Segmentation	Incomplete Segmentation	Incomplete Segmentation	NONE	NONE	NONE
52	B	2	Incomplete Segmentation	Incomplete Segmentation	Incomplete Segmentation	NONE	NONE	NONE
53	I3	3	22.6757	64.4902	3.68072	NONE	ai3Cuticle2Volume.mod	ai3Cuticle2Length.mod
54	I2	2	18.9751	60.0599	3.63912	NONE	ai2Cuticle1Volume.mod	ai2Cuticle1Length.mod
55	I2	2	18.2272	57.1243	3.4336	NONE	ai2Cuticle2Volume.mod	ai2Cuticle2Length.mod
56	I3	3	22.8029	64.0102	3.54249	NONE	ai3Cuticle3Volume.mod	ai3Cuticle3Length.mod
57	I3	3	Incomplete Segmentation	Incomplete Segmentation	Incomplete Segmentation	NONE	NONE	NONE
58	I3	3	23.3976	64.7327	3.5964	NONE	ai3Cuticle4Volume.mod	ai3Cuticle4Length.mod
59	T1	1	Incomplete Segmentation	Incomplete Segmentation	Incomplete Segmentation	NONE	NONE	NONE
60	B	2	17.3995	56.4159	3.99966	NONE	NONE	NONE
61	B	INC	17.6858	57.0046	3.84671	NONE	NONE	NONE
62	I3	3	25.3165	69.2058	3.78208	NONE	ai3Cuticle5Volume.mod	ai3Cuticle5Length.mod
63	I2	2	19.2195	60.6949	3.10835	NONE	ai2Cuticle3Volume.mod	ai2Cuticle3Length.mod
64	I2	2	21.3373	63.4531	3.5133	NONE	ai2Cuticle4Volume.mod	ai2Cuticle4Length.mod
65	B	2	14.0546	48.0982	3.40038	NONE	NONE	NONE
66	B	2	12.3766	42.8969	3.00386	NONE	NONE	NONE
67	B	2	12.3308	42.5412	3.0404	NONE	NONE	NONE
68	B	2	18.2024	56.2609	3.87952	NONE	NONE	NONE
69	B	2	15.7924	50.6767	3.62448	NONE	NONE	NONE
70	B	2	14.5115	49.6087	3.16897	NONE	NONE	NONE
71	B	2	15.2439	47.9727	3.4906	NONE	NONE	NONE
72	B	2	17.1086	56.1884	3.93485	NONE	NONE	NONE
73	B	2	Incomplete Segmentation	Incomplete Segmentation	Incomplete Segmentation	NONE	NONE	NONE
74	B	2	15.8092	51.3057	3.59583	NONE	NONE	NONE
75	B	2	16.9005	54.8557	3.47699	NONE	NONE	NONE
76	B	2	17.6073	54.6068	3.04955	NONE	NONE	NONE
77	B	2	17.4728	56.2723	3.80522	NONE	NONE	NONE

## Sheet: Or47b Ant2
Object Number	Sensilla Type	Number of ORNs	Sensillum Volume (um3)	Sensillum Surface Area (um2)	Diameter of Sensillum Basal Attachment (um)	ORN Model Segmented	Cuticle Volume Model Segmented	Cuticle Length Model Analyzed
1	T2	2	54.0445	132.971	4.83594	NONE	T2Cuticle1Volume.mod	T2Cuticle1Length.mod
2	T3	3	62.0717	145.65	4.7471	NONE	T3Cuticle1Volume.mod	T3Cuticle1Length.mod
3	T1	1	48.9494	129.35	4.25952	NONE	T1Cuticle1Volume.mod	T1Cuticle1Length.mod
4	I3	3	21.7653	61.1835	4.15875	NONE	ai3Cuticle1Volume.mod	ai3Cuticle1Length.mod
5	C	3	9.33769	33.1447	3.85484	NONE	NONE	NONE
6	C	3	8.05413	32.6801	3.56839	NONE	NONE	NONE
7	C	?	Incomplete Segmentation	Incomplete Segmentation	Incomplete Segmentation	NONE	NONE	NONE
8	C	3	6.24274	27.2178	3.03426	NONE	NONE	NONE
9	C	3	7.78813	33.1575	3.34893	NONE	NONE	NONE
10	C	3	6.01247	27.6602	3.35978	NONE	NONE	NONE
11	C	3	6.99241	27.591	3.81726	NONE	NONE	NONE
12	C	3	8.69837	32.312	4.37253	NONE	NONE	NONE
13	C	3	10.4068	45.0176	4.69484	NONE	NONE	NONE
14	C	3	8.40193	31.7465	4.29097	NONE	NONE	NONE
15	C	3	7.37046	30.8538	4.17477	NONE	NONE	NONE
16	C	3	6.83809	29.3009	3.89097	NONE	NONE	NONE
17	C	3	8.27788	30.6679	3.8068	NONE	NONE	NONE
18	C	3	8.12462	29.3349	3.89302	NONE	NONE	NONE
19	C	3	7.06211	29.045	3.34987	NONE	NONE	NONE
20	C	3	Incomplete Segmentation	Incomplete Segmentation	Incomplete Segmentation	NONE	NONE	NONE
21	C	3	8.23735	31.2871	3.77144	NONE	NONE	NONE
22	T2	2	56.0851	124.387	4.1202	NONE	T2Cuticle2Volume.mod	T2Cuticle2Length.mod
23	T3	3	57.9282	131.825	4.22439	NONE	T3Cuticle11Volume.mod	T3Cuticle11Length.mod
24	T3	3	60.0529	132.372	4.18779	T3Model4Morphometrics.mod	T3Model4CuticleVolume.mod	T3Model4CuticleLength.mod
25	I3	3	19.656	60.2535	3.56425	NONE	ai3Cuticle2Volume.mod	ai3Cuticle2Length.mod
26	T3	3	50.1498	118.438	4.18155	NONE	T3Cuticle2Volume.mod	T3Cuticle2Length.mod
27	I2	2	20.3139	62.666	3.82335	NONE	ai2Cuticle1Volume.mod	ai2Cuticle1Length.mod
28	T3	3	52.998	121.473	4.48147	T3Model1Morphometrics.mod	T3Model1CuticleVolume.mod	T3Model1CuticleVolume.mod
29	T3	3	55.9109	126.06	4.03824	NONE	T3Cuticle3Volume.mod	T3Cuticle3Length.mod
30	T1	1	45.8228	116.726	3.79063	NONE	T1Cuticle7Volume.mod	T1Cuticle7Length.mod
31	T3	3	51.8293	120.485	3.86788	NONE	T3Cuticle4Volume.mod	T3Cuticle4Length.mod
32	T3	3	Incomplete Segmentation	Incomplete Segmentation	Incomplete Segmentation	NONE	NONE	NONE
33	T2	2	Incomplete Segmentation	Incomplete Segmentation	Incomplete Segmentation	NONE	NONE	NONE
34	T3	3	Incomplete Segmentation	Incomplete Segmentation	Incomplete Segmentation	NONE	NONE	NONE
35	I2	2	23.8425	67.4448	3.77391	NONE	ai2Cuticle2Volume.mod	ai2Cuticle2Length.mod
36	T3	3	52.8817	120.531	3.74169	T3Model3Morphometrics.mod	T3Model3CuticleVolume.mod	T3Model3CuticleVolume.mod
37	T1	1	43.7826	112.197	3.54928	NONE	T1Cuticle2Volume.mod	T1Cuticle2Length.mod
38	T1	1	47.8935	120.551	3.87122	NONE	T1Cuticle3Volume.mod	T1Cuticle3Length.mod
39	T2	2	51.635	121.401	3.6433	NONE	T2Cuticle3Volume.mod	T2Cuticle3Length.mod
40	T2	2	52.1153	121.765	3.67162	NONE	T2Cuticle4Volume.mod	T2Cuticle4Length.mod
41	T3	3	50.3457	118.277	3.84689	NONE	T3Cuticle5Volume.mod	T3Cuticle5Length.mod
42	I2	2	26.3322	74.7298	3.77441	NONE	ai2Cuticle3Volume.mod	ai2Cuticle3Length.mod
43	B	2	16.9046	53.2821	3.72627	NONE	NONE	NONE
44	T0	0	47.9106	115.902	4.0667	NONE	EmptyTrichoidCuticleVolume.mod	EmptyTrichoidCuticleLength.mod
45	T0	0	Incomplete Segmentation	Incomplete Segmentation	Incomplete Segmentation	NONE	NONE	NONE
46	T2	2	56.2445	127.465	4.33635	NONE	T2Cuticle5Volume.mod	T2Cuticle5Length.mod
47	B	2	14.4515	45.9344	3.07847	NONE	NONE	NONE
48	T1	1	50.4508	124.017	3.57229	NONE	T1Cuticle4Volume.mod	T1Cuticle4Length.mod
49	T1	1	47.9967	118.371	3.54729	NONE	T1Cuticle5Volume.mod	T1Cuticle5Length.mod
50	T1	1	Incomplete Segmentation	Incomplete Segmentation	Incomplete Segmentation	NONE	NONE	NONE
51	T2	2	Incomplete Segmentation	Incomplete Segmentation	Incomplete Segmentation	NONE	NONE	NONE
52	T2	2	Incomplete Segmentation	Incomplete Segmentation	Incomplete Segmentation	NONE	NONE	NONE
53	T2	2	Incomplete Segmentation	Incomplete Segmentation	Incomplete Segmentation	NONE	NONE	NONE
54	T3	3	Incomplete Segmentation	Incomplete Segmentation	Incomplete Segmentation	NONE	NONE	NONE
55	T3	3	57.6111	127.491	3.56183	NONE	T3Cuticle6Volume.mod	T3Cuticle6Length.mod
56	T3	3	59.0918	132.526	4.39642	NONE	T3Cuticle7Volume.mod	T3Cuticle7Length.mod
57	T3	3	57.0149	128.953	4.12784	NONE	T3Cuticle8Volume.mod	T3Cuticle8Length.mod
58	T1	1	Incomplete Segmentation	Incomplete Segmentation	Incomplete Segmentation	NONE	NONE	NONE
59	T3	3	56.1661	127.617	3.84726	NONE	T3Cuticle9Volume.mod	T3Cuticle9Length.mod
60	T3	3	56.638	126.201	4.15937	NONE	T3Cuticle10Volume.mod	T3Cuticle10Length.mod
61	T3	3	Incomplete Segmentation	Incomplete Segmentation	Incomplete Segmentation	NONE	NONE	NONE
62	NO	NO	NO	NO	NO	NONE	NONE	NONE
63	T2	2	Incomplete Segmentation	Incomplete Segmentation	Incomplete Segmentation	NONE	NONE	NONE
64	T1	1	Incomplete Segmentation	Incomplete Segmentation	Incomplete Segmentation	NONE	NONE	NONE
65	T1	1	41.0325	109.568	3.46132	NONE	T1Cuticle6Volume.mod	T1Cuticle6Length.mod
66	T2	2	Incomplete Segmentation	Incomplete Segmentation	Incomplete Segmentation	NONE	NONE	NONE
67	T2	2	Incomplete Segmentation	Incomplete Segmentation	Incomplete Segmentation	NONE	NONE	NONE
68	T2	2	Incomplete Segmentation	Incomplete Segmentation	Incomplete Segmentation	NONE	NONE	NONE
69	I3	3	23.3288	67.0017	3.67399	NONE	ai3Cuticle3Volume.mod	ai3Cuticle3Length.mod
70	I3	3	Incomplete Segmentation	Incomplete Segmentation	Incomplete Segmentation	NONE	NONE	NONE
71	B	2	Incomplete Segmentation	Incomplete Segmentation	Incomplete Segmentation	NONE	NONE	NONE
72	T2	2	Incomplete Segmentation	Incomplete Segmentation	Incomplete Segmentation	NONE	NONE	NONE
73	B	2	Incomplete Segmentation	Incomplete Segmentation	Incomplete Segmentation	NONE	NONE	NONE
74	I2	2	22.0476	68.6117	3.41545	NONE	ai2Cuticle4Volume.mod	ai2Cuticle4Length.mod
75	I2	2	23.7976	72.2669	3.14662	NONE	ai2Cuticle5Volume.mod	ai2Cuticle5Length.mod
76	I3	3	22.5128	66.1167	3.35335	NONE	ai3Cuticle4Volume.mod	ai3Cuticle4Length.mod
77	B	2	14.8849	50.9655	3.31413	NONE	NONE	NONE
78	I2	2	21.0465	63.0529	3.28293	NONE	ai2Cuticle6Volume.mod	ai2Cuticle6Length.mod
79	I2	2	19.5328	62.1338	3.52585	NONE	ai2Cuticle7Volume.mod	ai2Cuticle7Length.mod
80	I3	3	23.3045	65.4831	3.45953	NONE	ai3Cuticle5Volume.mod	ai3Cuticle5Length.mod
81	I2	2	19.7479	63.6117	3.58655	NONE	ai2Cuticle8Volume.mod	ai2Cuticle8Length.mod
82	I3	3	Incomplete Segmentation	Incomplete Segmentation	Incomplete Segmentation	NONE	NONE	NONE
83	B	2	16.3829	52.3137	3.52293	NONE	NONE	NONE
84	I2	2	23.0888	68.4081	3.64862	NONE	ai2Cuticle9Volume.mod	ai2Cuticle9Length.mod
85	I3	3	22.0577	63.8727	3.24385	NONE	ai3Cuticle6Volume.mod	ai3Cuticle6Length.mod
86	I3	3	21.1205	62.8456	3.51169	NONE	ai3Cuticle7Volume.mod	ai3Cuticle7Length.mod
87	I3	3	23.1026	67.9954	3.53329	NONE	ai3Cuticle8Volume.mod	ai3Cuticle8Length.mod
88	I2	2	24.2537	68.2707	3.53462	NONE	ai2Cuticle10Volume.mod	ai2Cuticle10Length.mod
89	T2	3	Incomplete Segmentation	Incomplete Segmentation	Incomplete Segmentation	NONE	NONE	NONE
90	I2	2	Incomplete Segmentation	Incomplete Segmentation	Incomplete Segmentation	NONE	NONE	NONE
91	I3	3	21.1921	63.5247	3.4173	NONE	ai3Cuticle9Volume.mod	ai3Cuticle9Length.mod
92	I2	2	25.3468	71.8286	3.71696	NONE	ai2Cuticle11Volume.mod	ai2Cuticle11Length.mod
93	B	2	17.0796	54.1817	3.65717	NONE	NONE	NONE
94	B	2	24.3228	67.1673	4.35149	NONE	NONE	NONE
95	B	2	19.4177	57.304	3.55672	NONE	NONE	NONE
96	I2	2	20.1888	62.3117	3.43797	NONE	ai2Cuticle12Volume.mod	ai2Cuticle12Length.mod
171	T3	3	58.2405	129.171		T3Model2Morphometrics.mod	T3Model2CuticleVolume.mod	T3Model2CuticleLength.mod

## Sheet: Or56a
Object Number	Sensilla Type	Number of ORNs	Sensillum Volume (um3)	Sensillum Surface Area (um2)	Diameter of Sensillum Basal Attachment (um)	ORN Model Segmented	Cuticle Volume Model Segmented	Cuticle Length Model Analyzed
1	T1	1	INCOMPLETE SEGMENTATION	INCOMPLETE SEGMENTATION	INCOMPLETE SEGMENTATION	NONE	NONE	NONE
2	T1	1	INCOMPLETE SEGMENTATION	INCOMPLETE SEGMENTATION	INCOMPLETE SEGMENTATION	NONE	NONE	NONE
3	T1	1	INCOMPLETE SEGMENTATION	INCOMPLETE SEGMENTATION	INCOMPLETE SEGMENTATION	NONE	NONE	NONE
4	B	2	INCOMPLETE SEGMENTATION	INCOMPLETE SEGMENTATION	INCOMPLETE SEGMENTATION	NONE	NONE	NONE
5	T1	1	INCOMPLETE SEGMENTATION	INCOMPLETE SEGMENTATION	INCOMPLETE SEGMENTATION	NONE	NONE	NONE
6	T	INC	INCOMPLETE SEGMENTATION	INCOMPLETE SEGMENTATION	INCOMPLETE SEGMENTATION	NONE	NONE	NONE
7	B4	2	31.1758	72.982	3.23955	NONE	ab4Cuticle1Volume.mod	ab4Cuticle1Length.mod
8	B4	2	30.8337	74.849	2.90443	NONE	ab4Cuticle2Volume.mod	ab4Cuticle2Length.mod
9	C	4	15.2817	48.9132	3.94524	NONE	ac1Cuticle1Volume.mod	ac1Cuticle1Length.mod
10	C	4	15.6135	47.8869	3.54009	NONE	ac1Cuticle2Volume.mod	ac1Cuticle2Length.mod
11	C	3	12.4041	42.348	3.38309	NONE	NONE	NONE
12	C	2	11.0288	38.0392	3.17272	NONE	NONE	NONE
13	C	2	13.0823	43.6327	3.41909	NONE	NONE	NONE
14	C	?	INCOMPLETE SEGMENTATION	iNCOMPLETE SEGMENTATION	iNCOMPLETE SEGMENTATION	NONE	NONE	NONE
15	C	?	iNCOMPLETE SEGMENTATION	iNCOMPLETE SEGMENTATION	iNCOMPLETE SEGMENTATION	NONE	NONE	NONE
16	C	4	16.7667	50.748	4.18401	NONE	ac1Cuticle3Volume.mod	ac1Cuticle3Length.mod
17	C	3	INCOMPLETE SEGMENTATION	INCOMPLETE SEGMENTATION	INCOMPLETE SEGMENTATION	NONE	NONE	NONE
18	C	2	11.9478	38.8954	3.50842	NONE	NONE	NONE
19	C	3	12.2798	44.2087	3.72747	NONE	NONE	NONE
20	C	2	13.0709	43.6962	3.65074	NONE	NONE	NONE
21	C	2	13.905	44.7289	3.10261	NONE	NONE	NONE
22	B	2	INCOMPLETE SEGMENTATION	INCOMPLETE SEGMENTATION	INCOMPLETE SEGMENTATION	NONE	NONE	NONE
23	B	2	INCOMPLETE SEGMENTATION	INCOMPLETE SEGMENTATION	INCOMPLETE SEGMENTATION	NONE	NONE	NONE
24	BX(3)	3	INCOMPLETE SEGMENTATION	INCOMPLETE SEGMENTATION	INCOMPLETE SEGMENTATION	abx(3)Model3Morphometrics.mod	NONE	NONE
25	B	2	24.2715	65.1547	3.0475	NONE	NONE	NONE
26	LB	2	47.1318	94.7992	2.85167	NONE	NONE	NONE
27	B	2	INCOMPLETE SEGMENTATION	INCOMPLETE SEGMENTATION	INCOMPLETE SEGMENTATION	NONE	NONE	NONE
28	B1	4	INCOMPLETE SEGMENTATION	INCOMPLETE SEGMENTATION	INCOMPLETE SEGMENTATION	NONE	NONE	NONE
29	B	2	45.9427	92.3308	2.84704	NONE	NONE	NONE
30	B	2	INCOMPLETE SEGMENTATION	INCOMPLETE SEGMENTATION	INCOMPLETE SEGMENTATION	NONE	NONE	NONE
31	B	2	INCOMPLETE SEGMENTATION	INCOMPLETE SEGMENTATION	INCOMPLETE SEGMENTATION	NONE	NONE	NONE
32	B	2	INCOMPLETE SEGMENTATION	INCOMPLETE SEGMENTATION	INCOMPLETE SEGMENTATION	NONE	NONE	NONE
33	B	2	INCOMPLETE SEGMENTATION	INCOMPLETE SEGMENTATION	INCOMPLETE SEGMENTATION	NONE	NONE	NONE
34	B	2	27.5763	67.8691	2.97205	NONE	NONE	NONE
35	B	2	INCOMPLETE SEGMENTATION	INCOMPLETE SEGMENTATION	INCOMPLETE SEGMENTATION	NONE	NONE	NONE
36	B	2	21.1044	58.9847	2.98892	NONE	NONE	NONE
37	B	2	INCOMPLETE SEGMENTATION	INCOMPLETE SEGMENTATION	INCOMPLETE SEGMENTATION	NONE	NONE	NONE
38	B	2	25.2084	64.8291	3.21015	NONE	NONE	NONE
39	B	2	22.723	62.6787	3.30702	NONE	NONE	NONE
40	B	2	23.2015	61.2139	3.08183	NONE	NONE	NONE
41	B	2	29.5428	74.5004	3.36094	NONE	NONE	NONE
42	B	2	23.9619	63.809	2.88235	NONE	NONE	NONE
43	B	INC	17.8493	54.4861	3.48409	NONE	NONE	NONE
44	B	2	INCOMPLETE SEGMENTATION	INCOMPLETE SEGMENTATION	INCOMPLETE SEGMENTATION	NONE	NONE	NONE
45	B	INC	INCOMPLETE SEGMENTATION	INCOMPLETE SEGMENTATION	INCOMPLETE SEGMENTATION	NONE	NONE	NONE
46	B	INC	20.0367	56.9721	3.43844	NONE	NONE	NONE
47	B	2	21.916	60.8392	3.17494	NONE	NONE	NONE
48	B	2	23.2423	65.5117	2.94565	NONE	NONE	NONE
49	B4	2	31.6712	76.2207	2.86862		ab4Cuticle3Volume.mod	ab4Cuticle3Length.mod
50	LB	2	50.9948	103.861	2.75056	NONE	NONE	NONE
51	LB	2	50.1659	100.663	2.90222	NONE	NONE	NONE
52	B4	2	INCOMPLETE SEGMENTATION	INCOMPLETE SEGMENTATION	INCOMPLETE SEGMENTATION	NONE	NONE	NONE
53	B	2	21.3718	55.7349	2.63949	NONE	NONE	NONE
54	B4	2	INCOMPLETE SEGMENTATION	INCOMPLETE SEGMENTATION	INCOMPLETE SEGMENTATION	NONE	NONE	NONE
55	B4	2	33.0612	78.691	2.49008		ab4Cuticle4Volume.mod	ab4Cuticle4Length.mod
56	B	2	20.8096	58.0591	2.5123	NONE	NONE	NONE
57	B	2	19.1465	56.6917	2.97911	NONE	NONE	NONE
58	B	2	23.1112	59.0765	2.97089	NONE	NONE	NONE
59	B	2	21.9904	60.5723	2.87173	NONE	NONE	NONE
60	B	2	22.9359	64.1106	2.83743	NONE	NONE	NONE
61	B4	2	INCOMPLETE SEGMENTATION	INCOMPLETE SEGMENTATION	INCOMPLETE SEGMENTATION	NONE	NONE	NONE
62	B0	0	INCOMPLETE SEGMENTATION	INCOMPLETE SEGMENTATION	INCOMPLETE SEGMENTATION	NONE	NONE	NONE

## Sheet: Ir75c
Object Number	Sensilla Type	Number of ORNs	Sensillum Volume (um3)	Sensillum Surface Area (um2)	Diameter of Sensillum Basal Attachment (um)	ORN Model Segmented	Cuticle Volume Model Segmented	Cuticle Length Model Analyzed
1	T1	1	Incomplete Segmentation	Incomplete Segmentation	Incomplete Segmentation	NONE	NONE	NONE
2	T2	2	Incomplete Segmentation	Incomplete Segmentation	Incomplete Segmentation	NONE	NONE	NONE
3	T1	1	Incomplete Segmentation	Incomplete Segmentation	Incomplete Segmentation	NONE	NONE	NONE
4	T(INC)	INC	Incomplete Segmentation	Incomplete Segmentation	Incomplete Segmentation	NONE	NONE	NONE
5	T1	1	Incomplete Segmentation	Incomplete Segmentation	Incomplete Segmentation	NONE	NONE	NONE
6	T1	1	Incomplete Segmentation	Incomplete Segmentation	Incomplete Segmentation	NONE	NONE	NONE
7	T1	1	Incomplete Segmentation	Incomplete Segmentation	Incomplete Segmentation	NONE	NONE	NONE
8	T1	1	Incomplete Segmentation	Incomplete Segmentation	Incomplete Segmentation	NONE	NONE	NONE
9	T1	1	Incomplete Segmentation	Incomplete Segmentation	Incomplete Segmentation	NONE	NONE	NONE
10	T1	1	Incomplete Segmentation	Incomplete Segmentation	Incomplete Segmentation	NONE	NONE	NONE
11	C3II	2	12.68	44.9816	4.60992	ac3IIModel1Morphometrics.mod	ac3IIModel1CuticleVolume.mod	ac3IIModel1CuticleLength.mod
12	C3I	2	10.2844	37.5387	4.14894	NONE	NONE	NONE
13	C3I	2	9.09089	35.9797	4.0456	NONE	NONE	NONE
14	C3II	2	10.45	36.1027	4.23267	ac3IIModel2Morphometrics.mod	ac3IIMode2CuticleVolume.mod	ac3IIModel2CuticleLength.mod
15	C3II	2	9.17254	38.0702	3.94165	NONE	ac3IICuticle1Volume.mod	ac3IICuticle1Length.mod
16	C3II	2	10.4392	38.893	4.27026	ac3IIModel4Morphometrics.mod	ac3IIModel4CuticleVolume.mod	ac3IIModel4CuticleLength.mod
17	C3II	2	9.9097	34.1099	3.35425	NONE	ac3IICuticle2Volume.mod	ac3IICuticle2Length.mod
18	C3I	2	8.7733	36.2827	3.58139	NONE	NONE	NONE
19	C3II	2	9.09451	31.7844	3.20512	ac3IIModel3Morphometrics.mod	ac3IIModel3CuticleVolume.mod	ac3IIModel3CuticleLength.mod
20	C3II	2	10.4641	38.9259	3.9957	NONE	ac3IICuticle3Volume.mod	ac3IICuticle3Length.mod
21	C3II	2	8.44825	32.031	3.29925	NONE	ac3IICuticle4Volume.mod	ac3IICuticle4Length.mod
22	C3I	2	9.80254	32.717	3.45588	NONE	NONE	NONE
23	C3I	2	8.14785	30.1539	3.1525	NONE	NONE	NONE
24	B	2	Incomplete Segmentation	Incomplete Segmentation	Incomplete Segmentation	NONE	NONE	NONE
25	LB	2	34.6962	76.0975	3.31744	NONE	NONE	NONE
26	B	2	24.9447	65.6655	3.07666	NONE	NONE	NONE
27	B	2	21.4001	60.3896	2.93687	NONE	NONE	NONE
28	B	2	Incomplete Segmentation	Incomplete Segmentation	Incomplete Segmentation	NONE	NONE	NONE
29	LB	2	34.4737	73.8973	3.01948	NONE	NONE	NONE
30	B	2	18.2898	50.4573	3.06876	NONE	NONE	NONE
31	B	2	19.6659	54.9068	2.94338	NONE	NONE	NONE
32	LB	2	38.615	83.0125	3.47631	NONE	NONE	NONE
33	B	2	19.8531	54.9586	3.17724	NONE	NONE	NONE
34	B	2	14.4006	45.2131	3.04118	NONE	NONE	NONE
35	B	2	22.8314	61.5514	2.98897	NONE	NONE	NONE
36	Bx(1)	1	19.6846	54.4932	3.44723	abx(1)Model3Morphometrics.mod	abx(1)Cuticle1Volume.mod	abx(1)Cuticle1Length.mod
37	B	2	Incomplete Segmentation	Incomplete Segmentation	Incomplete Segmentation	NONE	NONE	NONE
38	B	2	13.7311	44.3821	2.87265	NONE	NONE	NONE
39	B	2	Incomplete Segmentation	Incomplete Segmentation	Incomplete Segmentation	NONE	NONE	NONE
40	B	2	15.6219	50.2741	3.13976	NONE	NONE	NONE
41	B	2	17.5207	51.9095	3.28502	NONE	NONE	NONE
42	B	2	18.2418	52.9084	2.88699	NONE	NONE	NONE
43	B	2	14.0784	44.0377	2.95292	NONE	NONE	NONE
44	B	2	13.6903	46.0442	3.39686	NONE	NONE	NONE
45	B	2	14.8191	46.0389	2.71371	NONE	NONE	NONE
46	B	2	15.8749	46.4707	2.83477	NONE	NONE	NONE
47	B	2	14.0477	44.1918	3.23888	NONE	NONE	NONE
48	B	2	14.7608	45.771	3.31464	NONE	NONE	NONE
49	B	2	24.9312	65.3261	3.0799	NONE	NONE	NONE
50	B	2	15.727	50.6701	2.85954	NONE	NONE	NONE
51	B	2	Incomplete Segmentation	Incomplete Segmentation	Incomplete Segmentation	NONE	NONE	NONE
52	LB	2	38.212	77.7475	3.63662	NONE	NONE	NONE
53	B	2	20.5418	56.2007	3.75485	NONE	NONE	NONE
54	B	2	18.1251	52.4418	3.60901	NONE	NONE	NONE
55	B	2	19.0691	56.029	3.4455	NONE	NONE	NONE
56	B	2	20.0623	55.3568	3.39974	NONE	NONE	NONE
57	B	2	Incomplete Segmentation	Incomplete Segmentation	Incomplete Segmentation	NONE	NONE	NONE
58	B	2	Incomplete Segmentation	Incomplete Segmentation	Incomplete Segmentation	NONE	NONE	NONE
59	B	2	Incomplete Segmentation	Incomplete Segmentation	Incomplete Segmentation	NONE	NONE	NONE
60	B	2	Incomplete Segmentation	Incomplete Segmentation	Incomplete Segmentation	NONE	NONE	NONE
61	B	2	Incomplete Segmentation	Incomplete Segmentation	Incomplete Segmentation	NONE	NONE	NONE
62	B	2	13.9062	45.2962	2.96862	NONE	NONE	NONE
63	B	2	13.7735	44.207	3.17792	NONE	NONE	NONE
64	B	2	13.9644	44.0793	3.07276	NONE	NONE	NONE
65	B	2	16.1867	48.4326	3.05773	NONE	NONE	NONE
66	B	2	16.0369	46.3162	2.81293	NONE	NONE	NONE
67	LB	2	35.2568	73.0969	3.27509	NONE	NONE	NONE
68	B	2	16.1032	48.0783	3.6938	NONE	NONE	NONE
69	LB	2	34.5412	72.5572	3.74315	NONE	NONE	NONE
75	C3I	2	8.93499	34.335	3.78533	NONE	NONE	NONE

## Sheet: Or88a
Object Number	Sensilla Type	Number of ORNs	Sensillum Volume (um3)	Sensillum Surface Area (um2)	Diameter of Sensillum Basal Attachment (um)	ORN Model Segmented	Cuticle Volume Model Segmented	Cuticle Length Model Analyzed
1	T1	1	42.4519	110.535	4.67408	NONE	T1Cuticle1Volume.mod	T1Cuticle1Length.mod
2	T3	2	Incomplete Segmentation	Incomplete Segmentation	Incomplete Segmentation	NONE	NONE	NONE
4	T1	1	41.4984	105.609	4.14871	NONE	T1Cuticle2Volume.mod	T1Cuticle2Length.mod
5	T1	1	43.09	110.047	3.37448	T1Model3Morphometrics.mod	T1Model3CuticleVolume.mod	T1Model3CuticleLength.mod
6	T1	1	39.2825	105.35	3.74527	T1Model4Morphometrics.mod	T1Model4CuticleVolume.mod	T1Model4CuticleLength.mod
7	T3	3	Incomplete Segmentation	Incomplete Segmentation	Incomplete Segmentation	NONE	NONE	NONE
8	T3	3	Incomplete Segmentation	Incomplete Segmentation	Incomplete Segmentation	NONE	NONE	NONE
9	T3	3	Incomplete Segmentation	Incomplete Segmentation	Incomplete Segmentation	NONE	NONE	NONE
10	T3	3	Incomplete Segmentation	Incomplete Segmentation	Incomplete Segmentation	NONE	NONE	NONE
11	T3	3	Incomplete Segmentation	Incomplete Segmentation	Incomplete Segmentation	NONE	NONE	NONE
12	T3	3	Incomplete Segmentation	Incomplete Segmentation	Incomplete Segmentation	NONE	NONE	NONE
13	T3	3	Incomplete Segmentation	Incomplete Segmentation	Incomplete Segmentation	T3Model8Morphometrics.mod	T3Model8CuticleVolume.mod	T3Model8CuticleLength.mod
14	T3	3	Incomplete Segmentation	Incomplete Segmentation	Incomplete Segmentation	NONE	NONE	NONE
15	T3	3	Incomplete Segmentation	Incomplete Segmentation	Incomplete Segmentation	NONE	NONE	NONE
16	C	3	10.4166	34.4965	4.01072	NONE	NONE	NONE
17	C	3	11.0565	38.4514	4.12689	NONE	NONE	NONE
18	C	3	12.3904	40.3724	4.1805	NONE	NONE	NONE
19	C	4	14.8199	47.9723	3.79704	NONE	ac1Cuticle1Volume.mod	ac1Cuticle1Length.mod
20	C	4	15.9647	51.0311	3.92947	ac1Model4Morphometrics.mod	ac1Model4CuticleVolume.mod	ac1Model4CuticleLength.mod
21	C	4	17.8256	50.6256	4.41257	ac1Model5Morphometrics.mod	ac1Model5CuticleVolume.mod	ac1Model5CuticleLength.mod
22	C	4	18.8215	53.0907	4.66847	NONE	ac1Cuticle2Volume.mod	ac1Cuticle2Length.mod
23	C	4	Incomplete Segmentation	Incomplete Segmentation	Incomplete Segmentation	NONE	NONE	NONE
24	C	4	14.5616	46.4604	4.02619	ac1Model1Morphometrics.mod	ac1Model1CuticleVolume.mod	ac1Model1CuticleLength.mod
25	C	3	13.4991	39.9218	4.25767	NONE	NONE	NONE
26	C	3	12.0973	40.5238	3.96213	NONE	NONE	NONE
27	C	3	14.2682	44.7626	3.84594	ac2/4Model2RoundedMorphometrics.mod	ac2Model2CuticleVolume.mod	ac2Model2CuticleLength.mod
28	C	3	11.289	36.7815	4.65901	NONE	NONE	NONE
29	C	3	12.5349	39.3664	3.80589	NONE	NONE	NONE
30	C	3	11.3954	38.3531	4.08812	ac2/4Model1RoundedMorphometrics.mod	ac2Model1CuticleVolume.mod	ac2Model1CuticleLength.mod
31	C	3	11.9968	42.3301	3.85592	NONE	NONE	NONE
32	C	4	16.4937	50.3804	4.48741	NONE	ac1Cuticle3Volume.mod	ac1Cuticle3Length.mod
33	C	4	17.1151	50.5386	4.38687	NONE	ac1Cuticle4Volume.mod	ac1Cuticle4Length.mod
34	B	INC	Incomplete Segmentation	Incomplete Segmentation	Incomplete Segmentation	NONE	NONE	NONE
35	B	2	Incomplete Segmentation	Incomplete Segmentation	Incomplete Segmentation	NONE	NONE	NONE
36	B	2	Incomplete Segmentation	Incomplete Segmentation	Incomplete Segmentation	NONE	NONE	NONE
37	B	2	20.0249	54.0517	3.8829	NONE	NONE	NONE
38	T1	1	Incomplete Segmentation	Incomplete Segmentation	Incomplete Segmentation	NONE	NONE	NONE
39	B	2	20.6884	56.6636	4.03575	NONE	NONE	NONE
40	B	2	18.908	53.632	3.37095	NONE	NONE	NONE
41	B	2	19.8167	57.6682	3.84368	NONE	NONE	NONE
42	T1	1	Incomplete Segmentation	Incomplete Segmentation	Incomplete Segmentation	NONE	NONE	NONE
43	B	2	17.2753	48.8755	3.5762	NONE	NONE	NONE
44	B	2	17.7585	51.4129	3.1605	NONE	NONE	NONE
45	C	3	Incomplete Segmentation	Incomplete Segmentation	Incomplete Segmentation	NONE	NONE	NONE
46	B	2	14.4067	46.6987	3.34231	NONE	NONE	NONE
47	T1	1	Incomplete Segmentation	Incomplete Segmentation	Incomplete Segmentation	NONE	NONE	NONE
48	B	2	19.0613	55.0221	3.21903	NONE	NONE	NONE
49	C	4	15.3854	47.3675	3.54403	ac1Model2Morphometrics.mod	ac1Model2CuticleVolume.mod	ac1Model2CuticleLength.mod
50	T1	1	Incomplete Segmentation	Incomplete Segmentation	Incomplete Segmentation	NONE	NONE	NONE
51	T1	1	Incomplete Segmentation	Incomplete Segmentation	Incomplete Segmentation	NONE	NONE	NONE
52	B	0	19.1995	58.891	3.95536	NONE	EmptyBasiconicCuticleVolume.mod	EmptyBasiconicCuticleVolume.mod
53	B	2	24.5593	64.7189	3.52493	NONE	NONE	NONE
54	B	2	16.6177	52.197	3.23408	NONE	NONE	NONE
55	T3	3	Incomplete Segmentation	Incomplete Segmentation	Incomplete Segmentation	NONE	NONE	NONE
56	B	2	15.3963	47.9253	3.07082	NONE	NONE	NONE
57	B	2	14.9592	46.6278	3.33184	NONE	NONE	NONE
58	T1	1	Incomplete Segmentation	Incomplete Segmentation	Incomplete Segmentation	NONE	NONE	NONE
59	B	2	18.9053	53.823	3.87996	NONE	NONE	NONE
60	B	2	17.9258	54.7002	3.83277	NONE	NONE	NONE
61	B	2	19.8615	58.1777	3.96466	NONE	NONE	NONE
62	I3	3	22.9463	64.1655	3.94941	ai3Model2Morphometrics.mod	ai3Model2CuticleVolume.mod	ai3Model2CuticleLength.mod
63	I2	2	23.5501	68.4648	4.02485	NONE	ai2Cuticle1Volume.mod	ai2Cuticle1Length.mod
64	I3	3	22.9274	62.7126	3.78536	ai3Model1Morphometrics.mod	ai3Model1CuticleVolume.mod	ai3Model1CuticleLength.mod
65	I2	2	23.267	66.5107	4.38018	ai2Model1Morphometrics.mod	ai2Model1CuticleVolume.mod	ai2Model1CuticleLength.mod
66	I2	2	22.5485	65.955	3.77258	ai2Model2Morphometrics.mod	ai2Model2CuticleVolume.mod	ai2Model2CuticleLength.mod
67	I3	3	Incomplete Segmentation	Incomplete Segmentation	Incomplete Segmentation	NONE	NONE	NONE
68	I2	2	23.8123	69.2166	4.05641	ai2Model3Morphometrics.mod	ai2Model3CuticleVolume.mod	ai2Model3CuticleLength.mod
69	I2	2	Incomplete Segmentation	Incomplete Segmentation	Incomplete Segmentation	NONE	NONE	NONE
70	T1	1	Incomplete Segmentation	Incomplete Segmentation	Incomplete Segmentation	NONE	NONE	NONE
71	B	2	17.2019	54.6654	3.42836	NONE	NONE	NONE
72	B	2	22.4917	62.0193	3.86817	NONE	NONE	NONE
73	B	2	19.0374	56.2391	3.21409	NONE	NONE	NONE
74	B	2	16.1554	47.6018	3.53127	NONE	NONE	NONE
75	T1	1	Incomplete Segmentation	Incomplete Segmentation	Incomplete Segmentation	NONE	NONE	NONE
77	C	3	10.6451	37.493	3.90426	NONE	NONE	NONE
82	T3	3	51.9033	118.103	4.61706	T3Model5Morphometrics.mod	T3Model5CuticleVolume.mod	T3Model5CuticleLength.mod
83	T3	3	52.1918	121.042	4.52863	T3Model6Morphometrics.mod	T3Model6CuticleVolume.mod	T3Model6CuticleLength.mod
84	T3	3	61.8739	130.822	4.70113	T3Model7Morphometrics.mod	T3Model7CuticleVolume.mod	T3Model7CuticleLength.mod
94	T1	1	47.4008	116.072	4.4639	NONE	T1Cuticle3Volume.mod	T1Cuticle3Length.mod
96	T1	1	46.2147	115.3	3.54938	NONE	T1Cuticle4Volume.mod	T1Cuticle4Length.mod
97	T1	1	52.502	126.837	4.47431	T1Model1Morphometrics.mod	T1Model1CuticleVolume.mod	T1Model1CuticleLength.mod	T1Torgmogen.mod, T1Trichogen.mod, T1Thecogen.mod
98	T1	1	48.6926	123.097	4.0568	T1Model2Morphometrics.mod	T1Model2CuticleVolume.mod	T1Model2CuticleLength.mod
99	T1	1	41.7279	105.95	3.47933	NONE	T1Cuticle5Volume.mod	T1Cuticle5Length.mod
101	T3	3	51.0353	122.591	4.46984	NONE	T3Cuticle1Volume.mod	T3Cuticle1Length.mod
102	T3	3	61.5422	133.706	4.12616	NONE	T3Cuticle2Volume.mod	T3Cuticle2Length.mod

## Sheet: Dataset Acquisition Parameters
APEX-Labeling	dwell time (µsec)	condenser aperture (µm)	accelerating voltage (kV)	z step size (nm)	Raster Size	Z-Dimensioin (number of sections)	pixel size (nm)	gas injection %
Ir75c	1.5	30	2.5	50	12k x 16k	658	5.06	0.7
Or7a	1	30	2.5	40	14k x14k	1599	4.11	0.85
Or22a	0.5	30	3	30	16k x 12k	1000	3.124	n.a.
Or47a	1	30	2	40	14k x 16k	999	4.379	0.4
Or47b(1)	2.5	30	2.5	50	12k x 9k	999	3.85	0.85
Or47b(2)	1	30	2.5	50	12k x 9k	1200	6.5	0.85
Or56a	1.5	30	2.5	40	14k x 11k	1423	5.96	0.85
Or88a	1.5	30	2.5	50	12k x 9k	1444	6.48	0.85
