# Supplementary material for: Systematic morphological and morphometric analysis of identified olfactory receptor neurons in Drosophila melanogaster
Source: eLife. 2021 Aug 23;10:e69896. doi: 10.7554/eLife.69896 (PMC8410077; doi:10.7554/eLife.69896)
Supplement: Table 1—source data 1. [file elife-69896-table1-data1.xlsx]

## Sheet: Cuticle Morphometrics
Each dataset is named based on the APEX2-labeled ORN type. The eight SBEM datasets used for this study are: Or22a (ab3A), Or7a (ab4A), Or56a (ab4B), Ir75c (ac3AII), Or47a (ab5B), Or47b (at4A) x2, and Or88a (at4C).
T1 MODELS		Identification critiria: Trichoid sensillum that houses one ORN
	Models
		Whole Cuticle Area (um3)	Whole Cuticle Surface Area (um2)	Inner Sensillum Lymph Area (um3)	Inner Sensillum Lymph Surface Area (um)	Base Diameter (um)	Length (um)	Cuticle Surface Area (Minus Base)
Or88a	T1Model1CuticleVolume.mod, T1Model1CuticleLength.mod	43.2969	113.573	25.9211	88.5595	4.47431	22.0424	97.8434
Or88a	T1Model2CuticleVolume.mod, T1Model2CuticleLength.mod	43.7283	115.296	23.9094	86.682	4.0568	21.6302	102.365
Or88a	T1Model3CuticleVolume.mod, T1Model3CuticleLength.mod	40.5587	109.32	22.85	80.5467	3.37448	21.3087	100.373
Or88a	T1Model4CuticleVolume.mod, T1Model4CuticleLength.mod	38.2689	103.352	18.9909	69.2283	3.74527	19.839	92.3307
Or88a	T1Cuticle1Volume.mod, T1Cuticle1Length.mod	42.4519	110.535	21.4096	74.8138	4.67408	20.4345	93.3695
Or88a	T1Cuticle2Volume.mod, T1Cuticle2Length.mod	41.4984	105.609	20.4558	70.8834	4.14871	19.5204	92.0854
Or88a	T1Cuticle3Volume.mod, T1Cuticle3Length.mod	47.4008	116.072	23.1671	77.1408	4.4639	19.7254	100.416
Or88a	T1Cuticle4Volume.mod, T1Cuticle4Length.mod	46.2147	115.3	23.3798	79.5249	3.54938	21.0723	105.401
Or88a	T1Cuticle5Volume.mod, T1Cuticle5Length.mod	41.7279	105.95	22.1144	76.0691	3.47933	20.3308	96.4383
Or47b Ant 2	T1Cuticle1Volume.mod, T1Cuticle1Length.mod	48.9494	129.35	24.1726	81.7663	4.25952	23.6756	115.094
Or47b Ant 2	T1Cuticle2Volume.mod, T1Cuticle2Length.mod	43.7826	112.197	22.4271	79.2132	3.54928	21.9285	102.299
Or47b Ant 2	T1Cuticle3Volume.mod, T1Cuticle3Length.mod	47.8935	120.551	20.7608	76.6662	3.87122	19.5295	108.776
Or47b Ant 2	T1Cuticle4Volume.mod, T1Cuticle4Length.mod	50.4508	124.017	23.9508	83.0453	3.57229	19.8106	113.99
Or47b Ant 2	T1Cuticle5Volume.mod, T1Cuticle5Length.mod	47.9967	118.371	23.4665	-80.6605	3.54729	22.9565	108.484
Or47b Ant 2	T1Cuticle6Volume.mod, T1Cuticle6Length.mod	41.0325	109.568	20.4255	74.8243	3.46132	19.0727	100.155
Or47b Ant 2	T1Cuticle7Volume.mod, T1Cuticle7Length.mod	45.8228	116.726	22.3683	78.6716	3.79063	22.1355	105.436
Or47b Ant 1	T1Cuticle1Volume.mod, T1Cuticle1Length.mod	47.2639	120.03	22.8852	89.4252	3.46902	22.2263	110.575
Or47b Ant 1	T1Cuticle2Volume.mod, T1Cuticle2Length.mod	46.7403	121.549	25.9198	91.4714	3.50595	23.6757	111.891
Or47a	T1Cuticle1Volume.mod, T1Cuticle1Length.mod	44.1284	115.866	23.5141	81.6525	3.54404	23.5732	105.997
	AVE	44.6951	114.907	22.7415	71.5539	3.81773	21.2888	103.333
	SEM	0.753083	1.5293	0.41115	8.56696	0.0930614	0.348946	1.62531
T2 MODELS		Identification critiria: Trichoid sensillum that houses two ORNs
Dataset	Model
		Whole Cuticle Area (um3)	Whole Cuticle Surface Area (um2)	Inner Sensillum Lymph Area (um3)	Inner Sensillum Lymph Surface Area (um)	Base Diameter (um)	Length (um)	Cuticle Surface Area (Minus Base)
Or47b Ant1	T2Model1CuticleVolume.mod, T2Model1CuticleLength.mod	53.349	128.238	29.8961	101.411	3.59712	22.1879	118.071
Or47b Ant1	T2Model2CuticleVolume.mod, T2Model2CuticleLength.mod	60.6816	136.855	32.5422	112.086	3.95021	23.2961	124.595
Or47b Ant1	T2Model3CuticleVolume.mod, T2Model3CuticleLength.mod	59.8109	139.645	31.5276	114.576	4.21975	23.3284	125.654
Or47b Ant1	T2Model4CuticleVolume.mod, T2Model4CuticleLength.mod	57.4852	132.675	27.9332	90.1995	3.93834	22.6302	120.488
Or47b Ant 2	T2Cuticle1Volume.mod, T2Cuticle1Length.mod	54.0445	132.971	26.2374	84.1944	4.83594	21.8685	114.596
Or47b Ant 2	T2Cuticle2Volume.mod, T2Cuticle2Length.mod	56.0851	124.387	29.4148	87.2161	4.1202	20.5856	111.049
Or47b Ant 2	T2Cuticle3Volume.mod, T2Cuticle3Length.mod	51.635	121.401	26.3994	84.3026	3.6433	21.4694	110.972
Or47b Ant 2	T2Cuticle4Volume.mod, T2Cuticle4Length.mod	52.1153	121.765	28.2047	86.4691	3.67162	22.526	111.173
Or47b Ant 2	T2Cuticle5Volume.mod, T2Cuticle5Length.mod	56.2445	127.465	28.8797	90.3852	4.33635	19.0864	112.69
Or47a	T2Cuticle1Volume.mod, T2Cuticle1Length.mod	55.815	128.377	20.842	76.6632	3.59712	22.4684	118.21
	AVE	55.7266	129.378	28.1877	92.7503	3.99099	21.9447	116.75
	SEM	0.9603	1.93666	1.03304	3.95921	0.126484	0.410026	1.75371
T3 MODELS		Identification critiria: Trichoid sensillum that houses three ORNs
Dataset	Model
		Whole Cuticle Area (um3)	Whole Cuticle Surface Area (um2)	Inner Sensillum Lymph Area (um3)	Inner Sensillum Lymph Surface Area (um)	Base Diameter (um)	Length (um)	Cuticle Surface Area (Minus Base)
Or47b Ant 2	T3Model1CuticleVolume.mod, T3Model1CuticleLength.mod	52.998	121.473	25.1818	83.9995	4.18779	19.7481	107.693
Or47b Ant 2	T3Model2CuticleVolume.mod, T3Model2CuticleLength.mod	58.2405	129.171	30.5281	92.0515	3.74169	21.202	118.171
Or47b Ant 2	T3Model3CuticleVolume.mod, T3Model3CuticleLength.mod	54.542	120.868	29.8016	89.8087	4.22439	20.1899	106.847
Or47b Ant 2	T3Model4CuticleVolume.mod, T3Model4CuticleLength.mod	60.0529	132.372	30.7733	94.5351	4.48147	21.1549	116.592
Or88a	T3Model5CuticleVolume.mod, T3Model5CuticleLength.mod	52.4009	119.058	26.1457	86.6524	4.61706	18.7588	102.309
Or88a	T3Model6CuticleVolume.mod, T3Model6CuticleLength.mod	52.216	121.097	27.2754	88.5384	4.52863	20.2223	104.983
Or88a	T3Model7CuticleVolume.mod, T3Model7CuticleLength.mod	61.8739	130.822	31.7428	100.313	4.70113	20.387	113.457
Or88A	T3Model8CuticleVolume.mod, T3Model8CuticleLength.mod	57.819	129.328	30.5141	95.5426	N/A	N/A	N/A
Or88a	T3Cuticle1Volume.mod, T3Cuticle1Length.mod	52.502	126.837	33.0683	94.3081	4.47431	18.5777	111.107
Or88a	T3Cuticle2Volume.mod, T3Cuticle2Length.mod	48.6926	123.097	26.2737	82.5035	4.0568	18.8715	110.166
Or47b Ant 2	T3Cuticle1Volume.mod, T3Cuticle1Length.mod	62.0717	145.65	30.3356	95.3052	4.7471	21.9564	127.944
Or47b Ant 2	T3Cuticle2Volume.mod, T3Cuticle2Length.mod	50.1498	118.438	24.0969	77.7	4.18155	19.4197	104.7
Or47b Ant 2	T3Cuticle3Volume.mod, T3Cuticle3Length.mod	55.9109	126.06	27.8731	85.8268	4.03824	20.31	113.247
Or47b Ant 2	T3Cuticle4Volume.mod, T3Cuticle4Length.mod	51.8293	120.485	26.5806	83.7151	3.86788	20.5316	108.73
Or47b Ant 2	T3Cuticle5Volume.mod, T3Cuticle5Length.mod	50.3457	118.277	26.0551	82.5137	3.84689	20.1923	106.65
Or47b Ant 2	T3Cuticle6Volume.mod, T3Cuticle6Length.mod	57.6111	127.491	31.1296	91.8018	3.56183	22.5323	117.523
Or47b Ant 2	T3Cuticle7Volume.mod, T3Cuticle7Length.mod	59.0918	132.526	28.7494	87.995	4.39642	21.6195	117.339
Or47b Ant 2	T3Cuticle8Volume.mod, T3Cuticle8Length.mod	57.0149	128.953	29.2609	89.568	4.12784	19.8444	115.565
Or47b Ant 2	T3Cuticle9Volume.mod, T3Cuticle9Length.mod	56.1661	127.617	28.8139	89.2764	3.84726	22.1994	115.987
Or47b Ant 2	T3Cuticle10Volume.mod, T3Cuticle10Length.mod	56.638	126.201	27.6149	84.8654	4.15937	21.1763	112.608
Or47b Ant 2	T3Cuticle11Volume.mod, T3Cuticle11Length.mod	57.9282	131.825	27.1361	86.5161	4.22439	21.9188	117.804
Or47b Ant 1	T3Cuticle1Volume.mod, T3Cuticle1Length.mod	58.8268	136.574	28.9722	92.9787	4.2517	22.6926	122.371
	AVE	55.5763	126.9	28.448	88.6082	4.20304	20.6431	112.943
	SEM	0.847989	1.48035	0.508605	1.15711	0.0700315	0.267353	1.39101
EMTPY TRICHOID MODEL		Identification critiria: Trichoid sensillum that houses no ORN
Dataset	Model
		Whole Cuticle Area (um3)	Whole Cuticle Surface Area (um2)	Inner Sensillum Lymph Area (um3)	Inner Sensillum Lymph Surface Area (um)	Base Diameter (um)	Length (um)	Cuticle Surface Area (Minus Base)
Or47b Ant 2	EmptyTrichoidCuticleVolume.mod, EmptyTrichoidCuticleLength.mod	47.98	116.59	24.3838	81.7158	4.0667	22.1278	103.596
AC1 MODELS		Identification critiria: Coeloconic sensillum that houses four ORNs
Dataset	Model
		Outer Barrier Area (um3)	Outer Barrier Surface Area (um2)	Middle Barrier Area (um3)	Middle Barrier Surface Area (um2)	Inner Barrier Area (um3)	Inner Barrier Surface Area (um2)	Base Diameter (um)	Length (um)	Cuticle Surface Area (Minus Base)
Or88a	ac1Model1CuticleVolume.mod, ac1Model1CuticleLength.mod	13.9809	47.5732	6.77961	24.3007	0.739546	7.07624	4.02619	5.58094	34.8366
Or88a	ac1Model2CuticleVolume.mod, ac1Model2CuticleLength.mod	13.5532	48.8948	6.6678	25.9953	0.609418	5.34176	3.54403	6.78791	39.0261
Or88a	ac1Model4CuticleVolume.mod, ac1Model4CuticleLength.mod	14.0391	50.8205	6.37639	24.7707	0.593878	5.54499	3.92947	6.48679	38.6885
Or88a	ac1Model5CuticleVolume.mod, ac1Model5CuticleLength.mod	15.9666	51.9226	6.95636	24.7985	0.639818	6.06601	4.41257	7.68686	36.6241
Or88a	ac1Cuticle1Volume.mod, ac1Cuticle1Length.mod	14.8199	47.9723	NA		0.557573	5.60654	3.79704	6.11628	36.6443
Or88a	ac1Cuticle2Volume.mod, ac1Cuticle2Length.mod	18.8215	53.0907			0.681169	6.25278	4.66847	7.46642	35.9664
Or88a	ac1Cuticle3Volume.mod, ac1Cuticle3Length.mod	16.4937	50.3804			0.507912	4.79412	4.48741	6.85521	34.5586
Or88a	ac1Cuticle4Volume.mod, ac1Cuticle4Length.mod	17.1151	50.5386			0.459994	4.8217	4.38687	6.64121	35.4178
Or56a	ac1Cuticle1Volume.mod, ac1Cuticle1Length.mod	15.2817	48.9132			0.462059	4.6674	3.94524	6.19936	36.6836
Or56a	ac1Cuticle2Volume.mod, ac1Cuticle2Length.mod	15.6135	47.8869			0.51719	4.45924	3.54009	6.36589	38.0401
Or56a	ac1Cuticle3Volume.mod, ac1Cuticle3Length.mod	16.7667	50.748			0.444775	4.78624	4.18401	6.27352	36.9933
Or47b Ant1	ac1Cuticle1Volume.mod, ac1Cuticle1Length.mod	9.23796	37.9159			0.229099	2.65745	3.97615	6.23956	25.4939
Or47b Ant1	ac1Cuticle2Volume.mod, ac1Cuticle2Length.mod	10.5281	42.0736			0.225672	3.04238	4.28911	5.12661	27.6192
Or47b Ant1	ac1Cuticle3Volume.mod, ac1Cuticle3Length.mod	9.14043	36.5616			0.258748	3.03569	4.32468	5.41881	21.8665
Or47b Ant1	ac1Cuticle4Volume.mod, ac1Cuticle4Length.mod	10.5559	43.2188			0.284768	3.10918	4.69092	5.57893	25.9294
Or47b Ant1	ac1Cuticle5Volume.mod, ac1Cuticle5Length.mod	9.96693	38.8393			0.249353	2.78095	4.1983	5.2717	24.9905
Or47b Ant1	ac1Cuticle6Volume.mod, ac1Cuticle6Length.mod	9.62457	37.1526			0.212499	2.92791	3.71253	5.63807	26.3232
Or47b Ant1	ac1Cuticle7Volume.mod, ac1Cuticle7Length.mod	11.6697	44.4256			0.325453	3.52846	4.63951	5.73272	27.5131
	AVE	13.5097	46.0516	6.69504	24.9663	0.444385	4.47217	4.15292	6.1926	32.4008
	SEM	0.728805	1.28755	0.121696	0.361511	0.0409744	0.320554	0.086402	0.169911	1.3553
AC3II MODELS		Identification critiria: Coeloconic sensillum that houses two ORNs and genetic labeling of ac3A
Dataset	Model
		Outer Barrier Area (um3)	Outer Barrier Surface Area (um2)	Middle Barrier Area (um3)	Middle Barrier Surface Area (um2)	Inner Barrier Area (um3)	Inner Barrier Surface Area (um2)	Base Diameter (um)	Length (um)	Cuticle Surface Area (Minus Base)
Ir75c	ac3IIModel1CuticleVolume.mod, ac3IIModel1CuticleLength.mod	12.0472	44.7915	5.97665	23.0361	0.946384	7.39528	4.60992	5.62111	28.094
Ir75c	ac3IIModel2CuticleVolume.mod, ac3IIModel2CuticleLength.mod	10.3254	37.1529	4.73291	19.3355	0.981475	7.13678	4.23267	5.398	23.0765
Ir75c	ac3IIModel3CuticleVolume.mod, ac3IIModele3CuticleLength.mod	8.44184	31.9556	3.92134	15.9675	0.779482	5.94948	3.20512	4.95692	23.8841
Ir75c	ac3IIModel4CuticleVolume.mod, ac3IIModel4CuticleLength.mod	10.0511	39.5468	4.29677	18.2312	0.714105	5.4591	4.27026	4.83149	25.2192
Ir75c	ac3IICuticle1Volume.mod, ac3IICuticle1Length.mod	9.17254	38.0702	NA		0.726517	6.42535	3.94165	5.45077	25.8629
Ir75c	ac3IICuticle2Volume.mod, ac3IICuticle2Length.mod	9.9097	34.1099			0.796623	6.35204	3.35425	5.33514	25.2698
Ir75c	ac3IICuticle3Volume.mod, ac3IICuticle3Length.mod	10.4641	38.9259			0.718282	6.17248	3.9957	5.46868	26.3815
Ir75c	ac3IICuticle4Volume.mod, ac3IICuticle4Length.mod	8.44825	32.031			0.895402	6.82405	3.29925	6.02198	23.4784
	AVE	9.85752	37.073	4.73192	19.1426	0.819784	6.46432	3.8636	5.38551	25.1583
	SEM	0.420058	1.52666	0.446817	1.47503	0.0378483	0.224528	0.183889	0.131278	0.588682
AC2 MODELS		Identification critiria: Coeloconic sensillum that houses three ORNs and round, flower-like sensillum cross-section profile
Dataset	Model
		Outer Barrier Area (um3)	Outer Barrier Surface Area (um2)	Middle Barrier Area (um3)	Middle Barrier Surface Area (um2)	Inner Barrier Area (um3)	Inner Barrier Surface Area (um2)	Base Diameter (um)	Length (um)	Cuticle Surface Area (Minus Base)
Or88a	ac2:4Model1CuticleVolume.mod, ac2:4Model1CuticleLength.mod	9.54818	32.9975	3.87709	16.6808	0.457117	4.76027	4.08812	5.5995	19.8661
Or88a	ac2:4Mode2CuticleVolume.mod, ac2:4Model2CuticleLength.mod	8.99929	32.3041	3.54933	15.5494	0.377	3.93262	3.84594	5.64465	20.6824
Or47b Ant1	ac2:4Model4CuticleVolume.mod, ac2:4Model3CuticleLength.mod	8.40331	32.0821	3.58764	15.3789	0.377	4.27761	3.16516	5.7824	24.2106
	AVE	8.98359	32.4612	3.67135	15.8697	0.403706	4.3235	3.69974	5.67552	21.5864
	SEM	0.330589	0.275685	0.103461	0.408526	0.0267057	0.240021	0.27628	0.0550087	1.33312
AC4 MODELS		Identification critiria: Coeloconic sensillum that houses three ORNs and sharp, star-like sensillum cross-section profile
Dataset	Model
		Outer Barrier Area (um3)	Outer Barrier Surface Area (um2)	Middle Barrier Area (um3)	Middle Barrier Surface Area (um2)	Inner Barrier Area (um3)	Inner Barrier Surface Area (um2)	Base Diameter (um)	Length (um)	Cuticle Surface Area (Minus Base)
Or47b Ant1	ac2:4Model3CuticleVolume.mod, ac2:4Model3CuticleLength.mod	9.13947	34.8288	3.90092	16.1831	0.321514	3.51425	3.25211	4.89186	26.5189
AB1 MODELS		Identification critiria: Large basiconic sensillum that houses four ORNs
Dataset	Model
		Whole Cuticle Area (um3)	Whole Cuticle Surface Area (um2)	Inner Sensillum Lymph Area (um3)	Inner Sensillum Lymph Surface Area (um)	Base Diameter (um)	Length (um)	Cuticle Surface Area (Minus Base)
Or7a	ab1Cuticle1Volume.mod, ab1Cuticle1Length.mod	35.2032	79.6854	23.6452	61.7018	3.39362	10.6066	70.6366
Or7a	ab1Cuticle2Volume.mod, ab1Cuticle2Length.mod	33.547	77.9389	21.2408	61.5661	3.23896	11.4174	69.6961
Or22a	ab1Cuticle1Volume.mod, ab1Cuticle1Length.mod	42.6492	83.0608	31.37	72.0239	4.12398	10.6706	69.698
Or22a	ab1Cuticle2Volume.mod, ab1Cuticle2Length.mod	42.2258	82.9976	32.5239	73.8458	3.94271	10.4929	70.7837
Or22a	ab1Cuticle3Volume.mod, ab1Cuticle3Length.mod	43.8312	85.338	32.1201	72.4089	4.01206	10.7898	72.6907
	AVE	39.4913	81.8041	28.18	68.3093	3.74226	10.7954	70.701
	SEM	2.1214	1.32138	2.37999	2.74215	0.177981	0.162731	0.547065
AB2 MODELS		Identification critiria: (1) Large basiconic sensillum that houses two ORNs, not genetically labled in the Or22a dataset; (2) Large basiconic sensillum that houses two ORNs, in the proximity of ab4 in the Or7a dataset
Dataset	Model
		Whole Cuticle Area (um3)	Whole Cuticle Surface Area (um2)	Inner Sensillum Lymph Area (um3)	Inner Sensillum Lymph Surface Area (um)	Base Diameter (um)	Length (um)	Cuticle Surface Area (Minus Base)
Or7a	ab2Model1CuticleVolume.mod, ab2Model1CuticleLength.mod	26.1736	64.2101	18.2717	52.72	3.15309	9.87101	56.3986
Or22a	ab2Cuticle1Volume.mod, ab2Cuticle1Length.mod	33.2555	72.0143	24.5257	60.335	3.28308	10.1694	63.5454
Or22a	ab2Cuticle2Volume.mod, ab2Cuticle2Length.mod	30.1566	68.3441	22.7712	57.6976	3.50276	10.0698	58.7039
Or22a	ab2Cuticle3Volume.mod, ab2Cuticle3Length.mod	39.5262	82.75	27.1668	68.4596	3.55794	11.2165	72.8037
	AVE	32.278	71.8296	23.1838	59.803	3.37422	10.3317	62.8629
	SEM	2.81744	3.97382	1.87003	3.28914	0.0946413	0.301382	3.63284
AB3 MODELS		Identification critiria: Large basiconic sensillum that houses two ORNs, genetically labled in the Or22a dataset
Dataset	Model
		Whole Cuticle Area (um3)	Whole Cuticle Surface Area (um2)	Inner Sensillum Lymph Area (um3)	Inner Sensillum Lymph Surface Area (um)	Base Diameter (um)	Length (um)	Cuticle Surface Area (Minus Base)
Or22a	ab3Mode5CuticleVolume.mod, ab3Model5CuticleLength.mod	32.8567	73.1748	25.7564	62.3855	3.48167	10.6452	63.6504
Or22a	ab3Cuticle1Volume.mod, ab3Cuticle1Length.mod	34.8151	86.7169	27.4267	70.3644	3.7081	12.063	75.9133
Or22a	ab3Cuticle2Volume.mod, ab3Cuticle2Length.mod	43.3744	105.023	33.6631	78.9556	3.73494	12.6479	94.0625
Or22a	ab3Cuticle3Volume.mod, ab3Cuticle3Length.mod	39.1765	84.2969	28.5973	69.4722	3.66621	11.9949	73.736
Or22a	ab3Cuticle4Volume.mod, ab3Cuticle4Length.mod	42.8903	96.7567	31.9186	77.306	4.02832	11.7369	84.0067
Or22a	ab3Cuticle5Volume.mod, ab3Cuticle5Length.mod	39.8923	85.909	31.5803	76.8714	3.42087	12.7848	76.7143
Or22a	ab3Cuticle6Volume.mod, ab3Cuticle6Length.mod	38.0237	80.1969	31.2919	72.4912	3.36171	11.5673	71.3175
	AVE	38.7184	87.4392	30.0335	72.5495	3.62883	11.92	77.0572
	SEM	1.46993	3.97812	1.06743	2.18161	0.086573	0.271099	3.66001
AB4 MODELS		Identification critiria: Genetically labled in the Or7a and Or56a datasets
Dataset	Model
		Whole Cuticle Area (um3)	Whole Cuticle Surface Area (um2)	Inner Sensillum Lymph Area (um3)	Inner Sensillum Lymph Surface Area (um)	Base Diameter (um)	Length (um)	Cuticle Surface Area (Minus Base)
Or7a	ab4Model1CuticleVolume.mod, ab4Model1CuticleLength.mod	24.0744	69.0616	14.0066	58.2215	4.11528	11.4428	55.7551
Or7a	ab4Model2CuticleVolume.mod, ab4Model2CuticleLength.mod	23.2513	68.2691	11.8479	44.7006	3.6625	10.6191	57.7296
Or7a	ab4Model3CuticleVolume.mod, ab4Model3CuticleLength.mod	20.8213	59.8651	11.245	42.2588	2.96281	11.4291	52.9679
Or56a	ab4Cuticle1Volume.mod, ab4Cuticle1Length.mod	31.1758	72.982	20.3754	56.2744	3.23955	11.0172	64.7362
Or56a	ab4Cuticle2Volume.mod, ab4Cuticle2Length.mod	30.8337	74.849	20.0634	58.1327	2.90443	11.7842	68.2209
Or56a	ab4Cuticle3Volume.mod, ab4Cuticle3Length.mod	31.6712	76.2207	21.8397	61.072	2.86862	11.6897	69.7551
Or56a	ab4Cuticle4Volume.mod, ab4Cuticle4Length.mod	33.0612	78.691	22.4708	61.1514	2.49008	11.1787	73.8192
	AVE	27.8413	71.4198	17.407	54.5445	3.17761	11.3087	63.2834
	SEM	1.86782	2.38606	1.83611	2.94185	0.207428	0.152843	2.9813
AB5 MODELS		Identification critiria: Genetically labled in the Or47a dataset
Dataset	Model
		Whole Cuticle Area (um3)	Whole Cuticle Surface Area (um2)	Inner Sensillum Lymph Area (um3)	Inner Sensillum Lymph Surface Area (um)	Base Diameter (um)	Length (um)	Cuticle Surface Area (Minus Base)
Or47a	ab5Model1CuticleVolume.mod, ab5Model1CuticleLength.mod	14.0039	46.4372	6.10721	28.2716	3.31319	9.07941	37.8123
Or47a	ab5Model2CuticleVolume.mod	13.0408	44.0418	6.14521	27.3686	3.28026	8.34044	35.5874
Or47a	ab5Model3CuticleVolume.mod	14.8418	48.8807	7.62388	33.0069	3.28489	9.7687	40.4024
Or47a	ab5Model4CuticleVolume.mod	13.225	45.1798	6.64139	30.0154	3.23807	8.55428	36.9415
Or47a	ab5Cuticle1Volume.mod, ab5Cuticle1Length.mod	11.985	41.3781	6.50355	28.2676	3.04087	8.36295	34.1127
Or47a	ab5Cuticle2Volume.mod, ab5Cuticle2Length.mod	13.258	44.4511	7.11454	30.7184	2.95249	9.10081	37.6019
Or47a	ab5Cuticle3Volume.mod, ab5Cuticle3Length.mod	14.168	45.1886	7.80948	32.1369	3.22111	9.20463	37.0364
Or47a	ab5Cuticle4Volume.mod, ab5Cuticle4Length.mod	13.3845	43.8887	6.8803	29.2045	3.29856	8.28008	35.3398
	AVE	13.4884	44.9308	6.85319	29.8737	3.20368	8.83641	36.8543
	SEM	0.303348	0.764473	0.223699	0.701303	0.0471592	0.188649	0.675092
ABX(1) MODELS		Identification critiria: Basiconic sensillum that houses one ORN
Dataset	Model
		Whole Cuticle Area (um3)	Whole Cuticle Surface Area (um2)	Inner Sensillum Lymph Area (um3)	Inner Sensillum Lymph Surface Area (um)	Base Diameter (um)	Length (um)	Cuticle Surface Area (Minus Base)
Or7a	abx(1)Model1CuticleVolume.mod, abx(1)Model1CuticleLength.mod	13.9782	46.1547	7.83211	32.9695	2.71777	8.98485	40.3512
Ir75c	abx(1)Cuticle1Volume.mod, abx(1)Cuticle1Length.mod	19.6846	54.4932	11.4916	38.3197	3.44723	9.02458	45.1562
Or47a	abx(1)Cuticle1Volume.mod, abx(1)Cuticle1Length.mod	14.8646	51.2352	6.70667	29.9721	3.56595	8.51696	41.2441
	AVE	16.1758	50.6277	8.67679	33.7538	3.24365	8.84213	42.2505
	SEM	1.77296	2.42621	1.44442	2.44144	0.265163	0.162989	1.47555
ABX(3) MODELS		Identification critiria: Basiconic sensillum that houses three ORNs
Dataset	Model
		Whole Cuticle Area (um3)	Whole Cuticle Surface Area (um2)	Inner Sensillum Lymph Area (um3)	Inner Sensillum Lymph Surface Area (um)	Base Diameter (um)	Length (um)	Cuticle Surface Area (Minus Base)
Or7a	abx(3)Model1CuticleVolume.mod, abx(3)Model1CuticleLength.mod	36.4274	83.3147	23.4487	69.6429	3.46867	10.2657	73.8612
Or7a	abx(3)Cuticle1Volume.mod, abx(3)Cuticle1Length.mod	36.5516	79.7491	24.1344	61.8549	3.6801	10.4833	69.108
	AVE	36.4895	81.5319	23.7916	65.7489	3.57439	10.3745	71.4846
	SEM	0.0621	1.7828	0.34285	3.894	0.105715	0.108804	2.37659
EMPTY BASICONIC		Identification critiria: Basiconic sensillum that houses no ORN
		Whole Cuticle Area (um3)	Whole Cuticle Surface Area (um2)	Inner Sensillum Lymph Area (um3)	Inner Sensillum Lymph Surface Area (um)	Base Diameter (um)	Length (um)	Cuticle Surface Area (Minus Base)
Or7a	EmptyBasiconicVuticleVolume.mod, EmptyBasiconiccuticleLength.mod	15.0854	48.9726	7.29925	31.4993	3.56176	8.99621	39.0049
AI2 MODELS		Identification critiria: Intermediate sensillum that houses two ORNs
Dataset	Model
		Whole Cuticle Area (um3)	Whole Cuticle Surface Area (um2)	Inner Sensillum Lymph Area (um3)	Inner Sensillum Lymph Surface Area (um)	Base Diameter (um)	Length (um)	Cuticle Surface Area (Minus Base)
Or88a	ai2Model1CuticleVolume.mod, ai2Model1CuticleLength.mod	21.8803	63.821	12.4942	46.9052	4.38018	12.9541	48.7463
Or88a	ai2Model2CuticleVolume.mod, ai2Model2CuticleLength.mod	22.6826	66.4646	12.2754	46.3095	3.77258	13.7523	55.282
Or88a	ai2Model3CuticleVolume.mod, ai2Model3CuticleLength.mod	22.8892	68.1591	12.3778	47.8547	4.05641	13.7914	55.2306
Or88a	ai2Cuticle1Volume.mod, ai2Cuticle1Length.mod	23.5501	68.4648	11.6701	46.0454	4.02485	13.957	55.7367
Or47b Ant 2	ai2Cuticle1Volume.mod, ai2Cuticle1Length.mod	20.3139	62.666	11.145	43.0693	3.82335	11.9181	51.1805
Or47b Ant 2	ai2Cuticle2Volume.mod, ai2Cuticle2Length.mod	23.8425	67.4448	12.5273	44.6884	3.77391	11.4733	56.2543
Or47b Ant 2	ai2Cuticle3Volume.mod, ai2Cuticle3Length.mod	26.3322	74.7298	12.6452	47.7117	3.77441	12.5559	63.5364
Or47b Ant 2	ai2Cuticle4Volume.mod, ai2Cuticle4Length.mod	22.0476	68.6117	10.6905	44.7859	3.41545	13.8622	59.4461
Or47b Ant 2	ai2Cuticle5Volume.mod, ai2Cuticle5Length.mod	23.7976	72.2669	11.8434	48.0135	3.14662	14.0091	64.4874
Or47b Ant 2	ai2Cuticle6Volume.mod, ai2Cuticle6Length.mod	21.0465	63.0529	10.0293	40.0747	3.28293	11.4503	54.5848
Or47b Ant 2	ai2Cuticle7Volume.mod, ai2Cuticle7Length.mod	19.5328	62.1338	9.14139	38.6562	3.52585	12.1408	52.3661
Or47b Ant 2	ai2Cuticle8Volume.mod, ai2Cuticle8Length.mod	19.7479	63.6117	10.1648	40.4121	3.58655	11.8563	53.5048
Or47b Ant 2	ai2Cuticle9Volume.mod, ai2Cuticle9Length.mod	23.0888	68.4081	11.1121	44.2727	3.64862	13.0237	57.9483
Or47b Ant 2	ai2Cuticle10Volume.mod, ai2Cuticle10Length.mod	24.2537	68.2707	11.8258	44.473	3.53462	12.5974	58.4544
Or47b Ant 2	ai2Cuticle11Volume.mod, ai2Cuticle11Length.mod	25.3468	71.8286	12.1398	46.3103	3.71696	12.8825	60.9733
Or47b Ant 2	ai2Cuticle12Volume.mod, ai2Cuticle12Length.mod	20.1888	62.3117	9.47405	39.7493	3.43797	12.1946	53.0248
Or47b Ant 1	ai2Cuticle1Volume.mod, ai2Cuticle1Length.mod	18.9751	60.0599	10.3456	42.5791	3.63912	12.8737	49.6545
Or47b Ant 1	ai2Cuticle2Volume.mod, ai2Cuticle2Length.mod	18.2272	57.1243	10.0211	41.1155	3.4336	12.3312	47.861
Or47b Ant 1	ai2Cuticle3Volume.mod, ai2Cuticle3Length.mod	19.2195	60.6949	9.32109	38.8357	3.10835	11.5633	53.1035
Or47b Ant 1	ai2Cuticle4Volume.mod, ai2Cuticle4Length.mod	21.3373	63.4531	10.3587	42.0912	3.5133	12.727	53.7548
	AVE	21.915	65.6789	11.0801	43.6977	3.62978	12.6957	55.2565
	SEM	0.502984	1.00748	0.261467	0.6959	0.0686511	0.189134	1.01504
AI3 MODELS		Identification critiria: Intermediate sensillum that houses three ORNs
Dataset	Model
		Whole Cuticle Area (um3)	Whole Cuticle Surface Area (um2)	Inner Sensillum Lymph Area (um3)	Inner Sensillum Lymph Surface Area (um)	Base Diameter (um)	Length (um)	Cuticle Surface Area (Minus Base)
Or88a	ai3Model1CuticleVolume.mod, ai3Model1CuticleLength.mod	23.8242	66.2204	12.1339	42.4403	3.78536	11.1614	54.9619
Or88a	ai3Model2CuticleVolume.mod, ai3Model2CuticleLength.mod	25.5718	70.207	13.5286	46.8159	3.94941	11.4652	57.9516
Or47b Ant 2	ai3Cuticle1Volume.mod, ai3Cuticle1Length.mod	21.7653	61.1835	12.3181	41.4656	4.15875	10.1551	47.5944
Or47b Ant 2	ai3Cuticle2Volume.mod, ai3Cuticle2Length.mod	19.656	60.2535	10.8134	39.1805	3.56425	9.94612	50.2719
Or47b Ant 2	ai3Cuticle3Volume.mod, ai3Cuticle3Length.mod	23.3288	67.0017	13.2273	46.2973	3.67399	11.4796	56.3959
Or47b Ant 2	ai3Cuticle4Volume.mod, ai3Cuticle4Length.mod	22.5128	66.1167	11.6604	43.5483	3.35335	11.6002	57.2814
Or47b Ant 2	ai3Cuticle5Volume.mod, ai3Cuticle5Length.mod	23.3045	65.4831	12.5698	43.5641	3.45953	10.7253	56.0794
Or47b Ant 2	ai3Cuticle6Volume.mod, ai3Cuticle6Length.mod	22.0577	63.8727	11.8928	43.3185	3.24385	11.2381	55.605
Or47b Ant 2	ai3Cuticle7Volume.mod, ai3Cuticle7Length.mod	21.1205	62.8456	10.8952	39.4753	3.51169	10.3086	53.1562
Or47b Ant 2	ai3Cuticle8Volume.mod, ai3Cuticle8Length.mod	23.1026	67.9954	12.0963	43.2557	3.53329	11.007	58.1864
Or47b Ant 2	ai3Cuticle9Volume.mod, ai3Cuticle9Length.mod	21.1921	63.5247	11.866	42.663	3.4173	11.0959	54.3492
Or47b Ant 1	ai3Cuticle1Volume.mod, ai3Cuticle1Length.mod	20.4487	59.6165	11.5372	42.8891	3.58028	11.3659	49.5449
Or47b Ant 1	ai3Cuticle2Volume.mod, ai3Cuticle2Length.mod	22.6757	64.4902	12.6476	46.0596	3.68072	11.6984	53.8456
Or47b Ant 1	ai3Cuticle3Volume.mod, ai3Cuticle3Length.mod	22.8029	64.0102	12.6988	44.3119	3.54249	11.359	54.1501
Or47b Ant 1	ai3Cuticle4Volume.mod, ai3Cuticle4Length.mod	23.3976	64.7327	12.3758	44.0437	3.5964	10.8627	54.5702
Or47b Ant 1	ai3Cuticle5Volume.mod, ai3Cuticle5Length.mod	25.3165	69.2058	13.3824	47.9029	3.78208	11.8123	57.9668
Or47a	ai3Cuticle1Volume.mod, ai3Cuticle1Length.mod	15.467	50.7781	9.48416	37.3274	3.4603	10.1216	41.3702
Or47a	ai3Cuticle2Volume.mod, ai3Cuticle2Length.mod	16.8048	53.7906	10.8476	40.1469	3.34955	10.4246	44.9753
Or47a	ai3Cuticle3Volume.mod, ai3Cuticle3Length.mod	15.8515	53.9753	10.0662	39.7864	3.20751	10.8344	45.8918
Or47a	ai3Cuticle4Volume.mod, ai3Cuticle4Length.mod	17.371	54.6466	10.5166	39.8545	3.38708	10.8124	45.6326
	AVE	21.3786	62.4975	11.8279	42.7173	3.56186	10.9737	52.489
	SEM	0.660243	1.22219	0.247347	0.63074	0.0519198	0.124152	1.12419

## Sheet: Cuticular Fingers
Sensillum ID	Total Sensillum Number	Cuticular fingers (AVE)	Cuticular fingers (Range)
ac1	20	6.65	5 to 8
ac2/4	48	6.14894	5 to 8
ac3	33	6.48485	5 to 9
ac3I*	6	5.83333	5 to 7
ac3II*	8	6.625	5 to 7
*ac3 sensilla are coeloconic sensilla that house three ORNs. ac3II sensilla were genetically labeled by Ir75c driver.
ac2/4 sensilla are coeloconic sensilla that house three ORNs.
	AC1					AC2/4					AC3
	Sensillum ID	Type	ORN number	Cuticular finger number		Sensillum ID	Type	ORN number	Cuticular finger number		Sensillum ID	Type	ORN number	Cuticular finger number
	39	C1	4	7		27	C2/4	3	6		5	C3	2	7
	40	C1	4	7		30	C2/4	3	5		6	C3	2	6
	41	C1	4	7		22	C2/4	3	6		7	C3	2	6
	42	C1	4	7		25	C2/4	3	6		8	C3	2	6
	43	C1	4	7		26	C2/4	3	6		9	C3	2	7
	44	C1	4	7		27	C2/4	3	6		10	C3	2	5
	45	C1	4	6		28	C2/4	3	5		11	C3	2	6
	47	C1	4	5		29	C2/4	3	7		12	C3	2	7
	9	C1	4	8		30	C2/4	3	6		13	C3	2	6
	10	C1	4	6		32	C2/4	3	6		1	C3	2	6
	16	C1	4	8		33	C2/4	3	6		24	C3	2	7
	19	C1	4	8		34	C2/4	3	7		36	C3	2	6
	20	C1	4	7		32	C2/4	3	7		37	C3	2	5
	21	C1	4	7		33	C2/4	3	6		38	C3	2	7
	22	C1	4	6		34	C2/4	3	7		12	C3	2	9
	23	C1	4	6		35	C2/4	3	7		13	C3	2	7
	24	C1	4	5		46	C2/4	3	7		18	C3	2	9
	32	C1	4	6		48	C2/4	3	6		20	C3	2	7
	33	C1	4	7		49	C2/4	3	6		21	C3	2	7
	49	C1	4	6		5	C2/4	3	7		12	C3I	2	6
AVERAGE				6.66667		6	C2/4	3	7		13	C3I	2	5
						8	C2/4	3	6		18	C3I	2	5
						9	C2/4	3	5		22	C3I	2	7
						10	C2/4	3	6		23	C3I	2	6
						11	C2/4	3	6		75	C3I	2	6
						12	C2/4	3	6		11	C3II	2	7
						13	C2/4	3	6		14	C3II	2	6
						14	C2/4	3	6		15	C3II	2	7
						15	C2/4	3	7		16	C3II	2	7
						16	C2/4	3	7		17	C3II	2	7
						17	C2/4	3	6		19	C3II	2	7
						18	C2/4	3	6		20	C3II	2	7
						19	C2/4	3	7		21	C3II	2	5
						20	C2/4	3	6	AVERAGE				6.48485
						21	C2/4	3	5
						11	C2/4	3	7
						17	C2/4	3	8
						19	C2/4	3	6
						16	C2/4	3	5
						17	C2/4	3	6
						18	C2/4	3	6
						25	C2/4	3	7
						26	C2/4	3	6
						28	C2/4	3	5
						29	C2/4	3	5
						31	C2/4	3	6
						45	C2/4	3	?
						77	C2/4	3	5
					AVERAGE				6.14894

## Sheet: Vacuole Structure
Sensillum Type	Total Qualified	% Containing Vacuole
Trichoid	52	26.9231		*Vacuole structures tend to localize at the proximal aspect of the sensillum cuticle--most oftentimes in close association with the site of termination of support cells(tormogen and thecogen); Highly variable in size. Do have an example where a large vacuole was located medially along the sensillum cuticle, and another instance where there was a single, small vacuole structure at the cuticle term…
Small/Thin Basiconics	138	70.2899		*Vacuole structures don't display any conserved patterns of localization--mostly evenly distributed throughout the sensillum cuticle; one exception is the ab4 populations where we observed localization at the distal-most tip of the sensillum cuticle; for future analysis, may consider approoaching this qualification more systematically by looking at patterns withing same sensillum subtype.
Large Basiconics	31	90.3226		*Vacuole structures don't display any conserved patterns of localization--mostly evenly distributed throughout the sensillum cuticle; Do tend to display LARGER Vacuoles
Intermediates	35	42.8571		*Vacuole structures don't display any conserved patterns of localization--mostly evenly distributed throughout the sensillum cuticle; Do tend to display SMALLER Vacuoles
Coeloconics	90	6.66667		*Vacoules only have so much space they can occupy (as the ISL volume is small and doesn't project very far up into the cuticular projection); accordingly, vacuoles are evenly distributed throughout the ISL space and are SMALL in size
*Criteria for Qualification:
(1) Must be whole/in-tact cuticle; even if partial cuticle and observed vacuole structure, it was discarded. Reduces sampling bias.
(2) Vacuole structure must be contained WITHIN the sensillum cuticle; was not counted if visualized in ISL space below the cuticle surface.
(3) if image quality lead to ANY questioning whether or not vacuole was present, the cuticle was marked as INCONCLUSIVE and was not included in analyis
SMALL/THIN BASICONICS					LARGE BASICONICS					COELOCONICS					INTERMEDIATES					TRICHOIDS
26	B	2	Y		47	B1	4	Y		1	C	2	Y		63	I2	2	N		8	T1	1	Y
27	B	2	Y		50	B1	4	Y		5	C	2	N		65	I2	2	N		1	T1	1	N
30	B	2	Y		4	B1	4	Y		6	C	2	Y		66	I2	2	N		4	T1	1	N
31	B	2	N		5	B1	4	Y		7	C	2	N		68	I2	2	N		5	T1	1	N
34	B	2	Y		6	B1	4	Y		8	C	2	N		27	I2	2	N		6	T1	1	N
35	B	2	Y		7	B2	2	N		9	C	2	N		35	I2	2	Y		94	T1	1	Y
38	B	2	Y		11	B2	2	Y		10	C	2	N		42	I2	2	Y		96	T1	1	N
40	B	2	Y		26	B2	2	Y		11	C	2	N		74	I2	2	Y		97	T1	1	Y
41	B	2	Y		8	B3	2	Y		12	C	2	N		75	I2	2	N		98	T1	1	Y
42	B	2	Y		9	B3	2	Y		13	C	2	N		78	I2	2	N		99	T1	1	N
43	B	2	Y		10	B3	2	Y		28	C	3	N		79	I2	2	N		3	T1	1	Y
44	B	2	N		12	B3	2	Y		29	C	3	N		81	I2	2	N		37	T1	1	N
45	B	2	Y		13	B3	2	Y		32	C	3	N		84	I2	2	N		38	T1	1	N
47	B	2	Y		14	B3	2	Y		33	C	3	N		88	I2	2	N		48	T1	1	N
48	B	2	Y		15	B3	2	Y		9	C	4	N		92	I2	2	Y		49	T1	1	N
49	B	2	Y		49	BX(3)	3	Y		10	C	4	N		54	I2	2	Y		65	T1	1	N
50	B	2	Y		51	BX(3)	3	Y		11	C	3	N		55	I2	2	N		1	T1	1	N
53	B	2	N		25	LB	2	Y		12	C	2	N		63	I2	2	Y		2	T1	1	N
54	B	2	Y		29	LB	2	Y		13	C	2	N		64	I2	2	N		30	T1	1	N
55	B	2	Y		32	LB	2	Y		16	C	4	N		4	I3	3	N		15	T2	2	Y
56	B	2	Y		52	LB	2	Y		18	C	2	Y		25	I3	3	N		1	T2	2	Y
62	B	2	Y		67	LB	2	Y		19	C	3	Y		76	I3	3	Y		22	T2	2	N
63	B	2	Y		69	LB	2	Y		20	C	2	N		80	I3	3	N		40	T2	2	N
64	B	2	Y		35	LB	2	Y		21	C	2	Y		85	I3	3	N		46	T2	2	N
65	B	2	Y		38	LB	INC	Y		16	C	3	N		86	I3	3	N		66	T2	2	N
66	B	2	Y		42	LB	INC	N		17	C	3	N		91	I3	3	N		3	T2	2	Y
68	B	2	Y		46	LB	2	Y		18	C	3	N		56	I3	3	Y		5	T2	2	N
14	B	2	Y		48	LB	2	N		19	C	4	N		58	I3	3	Y		6	T2	2	N
15	B	2	Y		26	LB	2	Y		20	C	4	N		62	I3	3	Y		20	T2	2	N
18	B	2	Y		50	LB	2	Y		21	C	4	N		39	I3	3	Y		39	T2	2	N
19	B	2	Y		51	LB	2	Y		22	C	4	N		50	I3	3	Y		82	T3	3	N
20	B	2	Y							24	C	4	N		53	I3	3	Y		83	T3	3	N
21	B	2	N		31					25	C	3	N		62	I3	3	Y		84	T3	3	Y
22	B	2	Y		28					26	C	3	N		62	I3	3	Y		85	T3	3	Y
23	B	2	N							27	C	3	N		64	I3	3	N		101	T3	3	N
25	B	2	N							28	C	3	N							102	T3	3	Y
26	B	2	Y							29	C	3	N		35					2	T3	3	N
27	B	2	Y							30	C	3	N		15					24	T3	3	N
28	B	2	Y							31	C	3	N							26	T3	3	N
29	B	2	Y							32	C	4	N							28	T3	3	Y
30	B	2	N							33	C	4	N							31	T3	3	Y
31	B	2	Y							49	C	4	N							55	T3	3	N
33	B	2	N							77	C	3	N							56	T3	3	N
34	B	2	N							23	C?	?	N							57	T3	3	N
36	B	2	Y							12	C3I	2	N							59	T3	3	N
37	B	0	Y							13	C3I	2	N							60	T3	3	N
41	B	2	Y							18	C3I	2	N							171	T3	3	N
44	B	2	N							22	C3I	2	N							4	T3	3	Y
45	B	2	Y							23	C3I	2	N							29	T3	3	N
52	B	2	N							75	C3I	2	N							36	T3	3	N
53	B	2	N							11	C3II	2	N							41	T3	3	N
36	B	2	Y							14	C3II	2	N							44	T0	0	N
37	B	2	Y							15	C3II	2	N
44	B	2	Y							16	C3II	2	Y							52
45	B	2	Y							17	C3II	2	N							14
48	B	2	Y							19	C3II	2	N
57	B	2	N							20	C3II	2	N
59	B	2	Y							21	C3II	2	N
63	B	2	Y							5	C	3	N
66	B	2	Y							6	C	3	N
67	B	2	Y							8	C	3	N
25	B	2	Y							9	C	3	N
29	B	2	Y							10	C	3	N
34	B	2	Y							11	C	3	N
36	B	2	N							12	C	3	N
38	B	2	Y							13	C	3	N
39	B	2	Y							14	C	3	N
40	B	2	Y							15	C	3	N
41	B	2	Y							16	C	3	N
42	B	2	Y							17	C	3	N
43	B	INC	Y							18	C	3	N
46	B	INC	Y							19	C	3	N
47	B	2	Y							21	C	3	N
48	B	2	Y							31	C	3	N
53	B	2	Y							32	C	3	N
56	B	2	Y							33	C	3	N
57	B	2	Y							34	C	3	N
58	B	2	Y							35	C	2	N
59	B	2	Y							36	C	2	N
37	B	2	Y							37	C	2	N
39	B	2	N							38	C	4	N
40	B	2	N							39	C	4	N
41	B	2	Y							40	C	4	N
43	B	2	N							41	C	4	N
44	B	2	Y							42	C	4	N
46	B	2	N							44	C	4	N
48	B	2	Y							45	C	3	N
52	B	0	Y							46	C	4	N
53	B	2	N							47	C	3	N
54	B	2	N							48	C	3	N
56	B	2	Y
57	B	2	N							90
59	B	2	N							6
60	B	2	N
61	B	2	N
71	B	2	Y
72	B	2	N
73	B	2	Y
74	B	2	N
43	B	2	Y
47	B	2	N
77	B	2	Y
83	B	2	N
93	B	2	N
94	B	2	Y
95	B	2	N
60	B	2	Y
61	B	INC	Y
65	B	2	N
66	B	2	N
67	B	2	N
68	B	2	N
69	B	2	Y
70	B	2	N
71	B	2	N
72	B	2	Y
74	B	2	N
75	B	2	N
76	B	2	N
77	B	2	Y
32	B4	2	Y
40	B4	2	Y
43	B4	2	Y
7	B4	2	Y
8	B4	2	Y
49	B4	2	Y
55	B4	2	Y
38	B5	2	Y
40	B5	2	Y
46	B5	2	Y
49	B5	2	Y
52	B5	2	N
56	B5	2	Y
60	B5	2	Y
61	B5	2	Y
36	Bx(1)	1	Y
24	Bx(1)	1	N
51	Bx(1)	1	Y
138
97

## Sheet: Measurements Table
					Length (um)	Cuticle Volume (um3)	Cuticle Surface Area (um2)	Sensillum Lumen Volume (um3)
TRICHOIDS		T1 MODELS (n=19)		AVE	21.2888	44.6951	103.333	22.7415
				SEM	0.348946	0.753083	1.62531	0.41115
		T2 MODELS (n=10)		AVE	21.9447	55.7266	116.75	28.1877
				SEM	0.410026	0.9603	1.75371	1.03304
		T3 MODELS (n=21)		AVE	20.6431	55.5763	112.943	28.448
				SEM	0.267353	0.847989	1.39101	0.508605
		EMPTY TRICHOID		VAL	22.1278	47.98	103.596	24.3838
BASICONICS		ABX(3) MODELS (n=2)		AVE	10.3745	36.4895	71.4846	23.7916
				SEM	0.108804	0.0621	2.37659	0.34285
		AB1 MODELS (n=5)		AVE	10.7954	39.4913	70.701	28.18
				SEM	0.162731	2.1214	0.547065	2.37999
		AB2 MODELS (n=4)		AVE	10.3317	32.278	62.8629	23.1838
				SEM	0.301382	2.81744	3.63284	1.87003
		AB3 MODELS (n=7)		AVE	11.92	38.7184	77.0572	30.0335
				SEM	0.271099	1.46993	3.66001	1.06743
		AB4 MODELS (n=7)		AVE	11.3087	27.8413	63.2834	17.407
				SEM	0.152843	1.86782	2.9813	1.83611
		AB5 MODELS (n=8)		AVE	8.83641	13.4884	36.8543	6.85319
				SEM	0.188649	0.303348	0.675092	0.223699
		ABX(1) MODELS (n=3)		AVE	8.84213	16.1758	42.2505	8.67679
				SEM	0.162989	1.77296	1.47555	1.44442
		EMPTY BASICONIC (n=1)		VAL	8.99621	15.0854	39.0049	7.29925
INTERMEDIATES		AI2 MODELS (n=20)		AVE	12.6957	21.915	55.2565	11.0801
				SEM	0.189134	0.502984	1.01504	0.261467
		AI3 MODELS (n=20)		AVE	10.9737	21.3786	52.489	11.8279
				SEM	0.124152	0.660243	1.12419	0.247347
COELOCONICS		AC1 MODELS (n=18)		AVE	6.1926	13.5097	32.4008	0.444385
				SEM	0.169911	0.728805	1.3553	0.0409744
		AC2 MODELS (n=3)		AVE	5.67552	8.98359	21.5864	0.403706
				SEM	0.0550087	0.330589	1.33312	0.0267057
		AC3II MODELS (n=8)		AVE	5.38551	9.85752	25.1583	0.819784
				SEM	0.131278	0.420058	0.588682	0.0378483
		AC4 MODELS (n=1)		VAL	4.89186	9.13947	26.5189	0.321514
