# Supplementary material for: Systematic morphological and morphometric analysis of identified olfactory receptor neurons in Drosophila melanogaster
Source: eLife. 2021 Aug 23;10:e69896. doi: 10.7554/eLife.69896 (PMC8410077; doi:10.7554/eLife.69896)
Supplement: Table 2—source data 1. [file elife-69896-table2-data1.xlsx]

## Sheet: ORN Morphometrics
Each dataset is named based on the APEX2-labeled ORN type. The eight SBEM datasets used for this study are: Or22a (ab3A), Or7a (ab4A), Or56a (ab4B), Ir75c (ac3AII), Or47a (ab5B), Or47b (at4A) x2, and Or88a (at4C).
Terminology: "Dataset" refers to the dataset from which the sensillum/ORN 3D models were reconstructed; "Model" refers to the sensillum identity.
T1 MODELS
Dataset	Model	Soma V (nm3)	Soma SA (nm2)	Inner Dendrite V (nm3)	Inner Dendrite SA (nm2)	Outer Dendrite V (nm3)	Outer Dendrite SA (nm2)
		A	A	A	A	A	A
Or88a	T1Model1Morphometric (Figure 2_Panel A)	45794000000	77028300	5184900000	29627400	1949790000	26309400
Or88a	T1Model2Morphometric (Figure S2_Panel C)	46662400000	82756300	5334750200	35512400	2728430930	44172151
Or88a	T1Model3Morphometric (Figure S2_Panel B)	47114700000	83126000	4488710000	3.52288e+07	2876773600	3.52288e+07
Or88a	T1Model4Morphometric (Figure S2_Panel A)	50181800000	73931500	5327520000	26821400	2777570000	41075000
	AVE	47438225000	79210525	5083970050	3.17975e+07	2.58314e+09	3.66963e+07
	SEM	9.54692e+08	2.24599e+06	2.01397e+08	2.14175e+06	2.13359e+08	3.9275e+06
T2 MODELS
Dataset	Model	Soma V (nm3)		Soma SA (nm2)		Inner Dendrite V (nm3)		Inner Dendrite SA (nm2)		Outer Dendrite V (nm3)		Outer Dendrite SA (nm2)
		A	B	A	B	A	B	A	B	A	B	A	B
Or47Bb Ant1	T2Model1Morphometric (Figure 3_Panel A)	77669500000	33060500000	104807000	65273100	5954470000	2965790000	34332000	23393900	2513460000	881991000	26690600	18377400
Or47Bb Ant1	T2Model2IMorphometric (Figure 3S_Panel A)	63087100000	35936500000	89360700	66541100	6721910000	4055720000	41188000	28638300	1806590000	1119540000	23355000	19110600
Or47Bb Ant1	T2Model2IIMorphometric (Figure 3S_Panel A)	61523600000	33270600000	93380700	60955600	6846770000	5602910000	38085400	34693200	2801310000	1044740000	26842100	﻿1.90608e+07
Or47Bb Ant1	T2Model3Morphometric	51380900000	37339600000	83262800	67495200	6483070000	5359770000	36877500	32069400	2461590000	941739000	31037400	22493400
	AVE	63415275000	34901800000	92702800	65066250	6501555000	4496047500	37620725	29698700	2395737500	997002500	26981275	19993800
	SEM	5.41368e+09	1.04342e+09	4.53922e+06	1.44381e+06	1.97352e+08	6.12831e+08	1.4233e+06	2.43995e+06	2.10115e+08	5.28961e+07	1.57337e+06	1.2676e+06
T3 MODELS
Dataset	Model	Soma V (nm3)			Soma SA (nm2)			Inner Dendrite V (nm3)			Inner Dendrite SA (nm2)			Outer Dendrite V (nm3)			Outer Dendrite SA (nm2)
		A	B	C	A	B	C	A	B	C	A	B	C	A	B	C	A	B	C
Or47b Ant 2	T3Model1Morphometric	48735900000	24233500000	33043600000	77311700	45498700	68039000	7042240000	2559770000	4790480000	41758900	18151200	33280200	1094310000	392268000	875692000	17542300	8059430	17057100
Or47b Ant 2	T3Model2Morphometric	62498800000	22252300000	50802900000	93000200	52883400	96206900	8187240000	3295860000	5607310000	45669300	24719700	35106800	2697480000	446969000	2559350000	31546200	8010280	32436100
Or47b Ant 2	T3Model3Morphometric	72772500000	21318600000	36051200000	103542000	49862300	70149600	8571630000	1920610000	6630180000	50399700	25504100	45545000	2038220000	1017700000	4322080000	27914400	19358500	39265200
Or47b Ant 2	T3Model4Morphometric (Figure 3_Panel B)	85888600000	26998600000	33316100000	115805000	52951400	66332800	6910880000	5236310000	5528850000	35365100	37295700	36396000	1758790000	617310000	844570000	22489900	12440100	17856200
Or88a	T3Model5Morphometric	70268000000	26231600000	46249500000	110263000	59367900	84386000	9321410000	5147200000	9351690000	46338600	34388500	51531300	4206550000	666465000	947633000	34309300	12495200	17411600
Or88a	T3Model6Morphometric (Figure 3S_Panel D)	68134400000	28784500000	53141200000	99199900	58066700	93094700	5697270000	4396650000	7053470000	30024400	26263500	38707300	3701901000	878936000	984443000	41675360	11539600	20420400			68134400000	28784500000	53141200000	99199900	58066700	93094700	5697270000	4396650000	7053470000	30024400	26263500	38707300	3701901000	878936000	984443000	41675360	11539600	20420400
Or88a	T3Model7Morphometric (Figure 3S_Panel B)	61491800000	30982700000	40976800000	99910400	56743700	94654400	5948210000	5176080000	5743890000	33153900	31263700	32664800	2988910000	818191000	1143960000	29683800	15403800	21038500
Or88a	T3Model8Morphometric	66990900000	28375200000	61194900000	102473000	56707100	96985800	6527100000	801863000	4082690000	29575400	14682700	24626200	3535970000	3289040000	1056240000	39241900	20337900	22283100
	AVE	67097612500	26147125000	44347025000	100188150	54010150	83731150	7275747500	3566792875	6098570000	3.90357e+07	2.65336e+07	37232200	2752766375	1015859875	1591746000	30550395	1.34556e+07	23471025
	SEM	3.74683e+09	1.18156e+09	3.62559e+09	4.09248e+06	1.64722e+06	4.76624e+06	4.57027e+08	5.97699e+08	5.70774e+08	2.84311e+06	2.72235e+06	2.91655e+06	3.7644e+08	3.33236e+08	4.3779e+08	2.85454e+06	1.63882e+06	2.85308e+06
AC1 MODELS
Dataset	Model	Soma V (nm3)				Soma SA (nm2)				Inner Dendrite V (nm3)				Inner Dendrite SA (nm2)				Outer Dendrite V (nm3)				Outer Dendrite SA (nm2)
		A	B	C	D	A	B	C	D	A	B	C	D	A	B	C	D	A	B	C	D	A	B	C	D
Or88a	ac1Model1Morphometric	21728200000	11292900000	8614150000	7915780000	44342400	35705100	24289300	28975300	1381310000	860580000	578436000	608323000	﻿8.59876e+06	8209720	5770840	7817690	667356000	144359000	146133000	175009000	8378540	3979410	4139430	4475200
Or88a	ac1Model2Morphometric (Figure 4_Panel B)	23162500000	12313800000	10002200000	8566720000	47672700	31614000	26371800	24826900	1200850000	859796000	605765000	779599700	8233600	7948450	5474410	11014811	574537000	131042000	125549000	234540000	6922590	3549060	3722520	4621670
Or88a	ac1Model4Morphometric	24317700000	10566900000	9943030000	6940200000	48579400	29780900	27185100	21641800	1593520000	821279000	499205000	590604000	10587900	9187870	4928010	6674100	546539000	109954000	121653000	183407000	7601520	3389170	3631940	4476660
Or88a	ac1Model5Morphometric	23598500000	12077700000	9905830000	8249690000	47334000	30981800	26281200	24874800	1338250000	805724000	493833000	697071000	11047700	8517090	4982210	8652470	691735600	137261800	121927800	198816800	8895181	3949690	3814240	5039560
	AVE	23201725000	11562825000	9616302500	7918097500	46982125	32020450	26031850	25079700	1378482500	836844750	544309750	668899425	9956400	8.46578e+06	5.28887e+06	8.53977e+06	620041900	130654200	128815700	197943200	7.94946e+06	3.71683e+06	3.82703e+06	4.65327e+06
	SEM	5.45867e+08	3.9726e+08	3.3464e+08	3.52013e+08	918338	1.2857e+06	615373	1.5028e+06	8.13537e+07	1.38471e+07	2.81716e+07	4.36347e+07	871566	267277	202275	919268	3.51805e+07	7.41693e+06	5.84029e+06	1.31573e+07	433400	146822	110582	133266
Atypical AC1 MODEL
Dataset	Model	Soma V (nm3)				Soma SA (nm2)				Inner Dendrite V (nm3)				Inner Dendrite SA (nm2)
		A	B	C	D	A	B	C	D	A	B	C	D	A	B	C	D
Or56a	ac1EnlargementModel1. (Figure 4S_Panel D,F)	53239200000	17184300000	15778400000	12922500000	75025800	47826900	42533200	37670400	12756700000	1766160000	1494330000	1216010000	29785100	15723500	16763900	15297500
AC3II MODELS
Dataset	Model	Soma V (nm3)		Soma SA (nm2)		Inner Dendrite V (nm3)		Inner Dendrite SA (nm2)		Outer Dendrite V (nm3)		Outer Dendrite SA (nm2)
		A	B	A	B	A	B	A	B	A	B	A	B
Ir75c	ac3IIModel1Morphometric	44591500000	22921700000	87501500	64801500	3645750000	2581970000	28604200	21881700	987441000	768162000	12123700	12781900
Ir75c	ac3IIModel2Morphometric	40236500000	20924300000	96381400	61617200	3441080000	2664130000	27767500	24705000	828290000	448082000	11897600	8602960
Ir75c	ac3IIModel3Morphometric (Figure 4_Panel A)	38319000000	22985800000	97222600	49664400	4773650000	2531930000	28712800	21252200	775396000	368053000	11165500	9515090
Ir75c	ac3IIModel4Morphometric	41936500000	27121500000	116981000	65685400	3123460000	4318110000	21048600	32012700	1058320000	786743000	13527600	13149300
	AVE	41270875000	23488325000	99521625	60442125	3745985000	3024035000	26533275	24962900	912361750	592760000	12178600	1.10123e+07
	SEM	1.33082e+09	1.30217e+09	6.22133e+06	3.69725e+06	3.59009e+08	4.32218e+08	1.84038e+06	2.46694e+06	6.63126e+07	1.07943e+08	493976	1.14546e+06
AC2 MODELS
Dataset	Model	Soma V (nm3)			Soma SA (nm2)			Inner Dendrite V (nm3)			Inner Dendrite SA (nm2)			Outer Dendrite V (nm3)			Outer Dendrite SA (nm2)
		A	B	C	A	B	C	A	B	C	A	B	C	A	B	C	A	B	C
Or88a	ac2:4Model1Morphometrics.mod (Figure 4_Panel C)	29189000000	23262300000	16374000000	69600200	55106600	48504800	2183580000	2152140000	1647410000	15844500	16249900	12346300	341156000	424310000	209094000	7047980	8250090	5685410
Or88a	ac2:4Mode2Morphometrics.mod	24075700000	23221800000	15519200000	68918100	51465100	37068600	5068910000	1951410000	1868600000	32109400	13327700	13382100	387952000	530349000	315745000	7678530	8920880	7143910
Or47b Ant1	ac2:4Model4Morphometrics.mod	26792800000	25671400000	14372600000	54847500	56412800	35388000	1982780000	2102470000	1132560000	13289000	15031400	8891810	NOT SEGMENTED
	AVE	2.66858e+10	2.40518e+10	1.54219e+10	6.44553e+07	5.43282e+07	4.03205e+07	3.07842e+09	2.06867e+09	1.54952e+09	20414300	1.48697e+07	11540070	364554000	477329500	262419500	7363255	8585485	6414660
	SEM	1.47705e+09	8.09868e+08	5.79798e+08	4.80792e+06	1.48036e+06	4.12082e+06	9.9693e+08	6.03595e+07	2.18041e+08	5.8939e+06	847434	1.35747e+06	2.3398e+07	5.30195e+07	5.33255e+07	315275	335395	729250
AC4 MODELS
Dataset	Model	Soma V (nm3)			Soma SA (nm2)			Inner Dendrite V (nm3)			Inner Dendrite SA (nm2)			Outer Dendrite V (nm3)			Outer Dendrite SA (nm2)
		A	B	C	A	B	C	A	B	C	A	B	C	A	B	C	A	B	C
Or47b Ant1	ac2:4Model3Morphometrics.mod (Figure 4_Panel D)	38300900000	31986700000	17918100000	64617100	59074200	39600300	1993960000	2722750000	1624600000	11764500	15893800	10651200	241821000	473087000	245665000	5170800	7438610	5012960
	AVE
	SEM
AB1 MODELS
Dataset	Model	Soma V (nm3)				Soma SA (nm2)				Inner Dendrite V (nm3)				Inner Dendrite SA (nm2)				Outer Dendrite V (nm3)				Outer Dendrite SA (nm2)
		A	B	C	D	A	B	C	D	A	B	C	D	A	B	C	D	A	B	C	D	A	B	C	D
Or7A	ab1Model1Morphometric (Figure 6_Panel A,B)	65824855900	65069300000	51100722400	29721700000	116209260	102107000	104753838	62172400	24021195000	21981300000	7355044000	2820023700	70236910	59174700	31039240	18385180	NOT SEGMENTED
Or7A	ab1Model2Morphometric	74101700000	56849400000	53101600000	26347100000	119313000	94336100	105707000	59824300	14766812680	20325709650	6095240000	2847072800	56193346	81968670	28635900	21454174
	AVE	69963277950	60959350000	52101161200	28034400000	117761130	98221550	105230419	60998350	19394003840	21153504825	6725142000	2833548250	63215128	70571685	29837570	19919677
	SEM	4.13842e+09	4.10995e+09	1.00044e+09	1687300000	1.55187e+06	3.88545e+06	476581	1.17405e+06	4627191160	8.27795e+08	629902000	1.35245e+07	7021782	11396985	1.20167e+06	1.5345e+06
AB2 MODELS
Dataset	Model	Soma V (nm3)		Soma SA (nm2)		Inner Dendrite V (nm3)		Inner Dendrite SA (nm2)		Outer Dendrite V (nm3)		Outer Dendrite SA (nm2)
		A	B	A	B	A	B	A	B	A	B	A	B
Or7A	ab2Model1Morphometric (Figure 6_Panel E,F)	93686200000	34400800000	131284000	68893700	20006500000	3321990000	63008400	26727400	9.8043e+09	491548681	2.75421e+08	1.3784e+07
	AVE
	SEM
AB3 MODELS
Dataset	Model	Soma V (nm3)		Soma SA (nm2)		Inner Dendrite V (nm3)		Inner Dendrite SA (nm2)		Outer Dendrite V (nm3)		Outer Dendrite SA (nm2)
		A	B	A	B	A	B	A	B	A	B	A	B
Or22A	ab3Model1Morphometric	44547700000	28526800000	88322000	74351700	15858600000	4439420000	80592100	34126600	NOT SEGMENTED
Or22a	ab3Model2Morphometric	48233400000	31569600000	93670400	95921600	11840400000	2983100000	57378400	20421300	NOT SEGMENTED
Or22a	ab3Model3Morphometric	47202200000	30407100000	106396000	86042600	16344100000	4757340000	71963500	32636600
Or22a	ab3Model4Morphometric	48013800000	30026200000	93936000	91331500	13238100000	4056810000	83600500	33780300
Or22a	ab3Mode5Morphometric	48300600000	35221400000	107985000	100769000	10031200000	4192840000	59639100	30899500
Or7a	ab3Model7Morphometric (Figure 7_Panel A,B)	59991200000	37650000000	89364300	62436300	15655700000	2443860000	55597700	16848300	6153482806	1950464950	1.44726e+08	3.95492e+07
	AVE	50348240000	32974860000	98270340	87300200	13421900000	3686790000	65635840	26917200	6153482806	1950464950	1.44726e+08	3.95492e+07
	SEM	2.41867e+09	1.48605e+09	3.73941e+06	6.67751e+06	1.1739e+09	4.23033e+08	5.32766e+06	3.4587e+06	N/A	N/A	N/A	N/A
AB4 MODELS
Dataset	Model	Soma V (nm3)		Soma SA (nm2)		Inner Dendrite V (nm3)		Inner Dendrite SA (nm2)		Outer Dendrite V (nm3)		Outer Dendrite SA (nm2)
		A	B	A	B	A	B	A	B	A	B	A	B
Or7a	ab4Model1Morphometric (Figure 8_Panel A,B)	66881600000	33057500000	95760400	60565600	8961630000	3985040000	28687400	21079200	4495430447	1292871928	9.7278e+07	3.31303e+07
Or7a	ab4Model2Morphometric	75291000000	36782600000	104582000	74427200	10690500000	2730310000	38299000	13914600	4.11212e+09	2454477232	9.91628e+07	3.5782e+07
Or7a	ab4Model3Morphometric	78155157000	35818700000	105468000	68164300	8657442880	4174290000	30822095	21676000	3.08363e+09	1.20336e+09	4.32252e+07	2.34674e+07
	AVE	7.34426e+10	35219600000	101936800	6.7719e+07	9.43652e+09	3629880000	3.26028e+07	1.88899e+07	3.89706e+09	1.65024e+09	7.98887e+07	3.07932e+07
	SEM	3.38308e+09	1.11629e+09	3.09877e+06	4.00769e+06	6.33107e+08	4.53091e+08	2.91399e+06	2.49363e+06	4.215e+08	4.0295e+08	1.83398e+07	3.74202e+06
AB5 MODELS
Dataset	Model	Soma V (nm3)		Soma SA (nm2)		Inner Dendrite V (nm3)		Inner Dendrite SA (nm2)		Outer Dendrite V (nm3)		Outer Dendrite SA (nm2)
		A	B	A	B	A	B	A	B	A	B	A	B
Or47a	ab5Model1Morphometric (Figure 8_Panel E,F)	34199100000	49574300000	68715400	80907000	4599560000	2066340000	25688800	17170000	900319027	962222956	2.42673e+07	2.27068e+07
Or47a	ab5Model2Morphometric	31670600000	34252000000	64165800	65127200	3061590000	727883000	16230500	14225500	958220375	3.35447e+08	26751214	1.07415e+07
Or47a	ab5Model3Morphometric	28764300000	35612900000	55437700	63438300	4029380000	1440670000	18542700	8784910	1.12921e+09	9.16649e+08	3.3568e+07	2.97191e+07
Or47a	ab5Model4Morphometric	30217700000	45017700000	57805500	80341100	3379510000	2861780000	18711600	18607700	932842711	1.05505e+09	2.44153e+07	3.19209e+07
	AVE	31212925000	41114225000	61531100	72453400	3767510000	1774168250	19793400	1.4697e+07	9.80148e+08	8.17343e+08	2.72505e+07	2.3772e+07
	SEM	1.15877e+09	3.6987e+09	3.02166e+06	4.73132e+06	3.42752e+08	4.54074e+08	2.045e+06	2.17149e+06	5.10809e+07	1.63193e+08	2.18131e+06	4.76707e+06
ABX(1) MODELS
Dataset	Model	Soma V (nm3)	Soma SA (nm2)	Inner Dendrite V (nm3)	Inner Dendrite SA (nm2)	Outer Dendrite V (nm3)	Outer Dendrite SA (nm2)
		A	A	A	A	A	A
Ir75c	abx(1)Model3Morphometric	38421200000	89879700	8402350000	43801000	1259004500	18194144
Or7a	abx(1)Model1IMorphometric (Figure 8S_Panel B)	NOT SEGMENTED		5898810000	32045100	1300000000	23700000
Or7a	abx(1)Model1IIMorphometric			6700250000	32444100	NOT SEGMENTED
	AVE	N/A	N/A	7000470000	3.60967e+07	1279502250	20947072
	SEM	N/A	N/A	7.38134e+08	3.85385e+06	20497750	2752928
ABX(3) MODELS
Dataset	Model	Soma V (nm3)			Soma SA (nm2)			Inner Dendrite V (nm3)			Inner Dendrite SA (nm2)			Outer Dendrite V (nm3)			Outer Dendrite SA (nm2)
		A	B	C	A	B	C	A	B	C	A	B	C	A	B	C	A	B	C
Or7a	abx(3)Model1Morphometric (Figure 7_Panel E)	NOT SEGMENTED												6367026974	4897114980	4.43559e+09	1.04023e+08	4.80179e+07	97800000
Or22a	abx(3)Model2Morphometric (Figure 7_Panel D)	65184619170	56617618200	44593280200	1.30728e+08	134755109	122736901	11323878220	21094135700	5884277200	65776964	113093863	47430685	NOT SEGMENTED
Or56a	abx(3)Model3Morphometric	53223100000	50967300000	42829100000	119973000	117928000	96004900	23660200000	15724700000	5919291000	83848300	65388900	39995530
	AVE	59203859585	53792459100	43711190100	1.2535e+08	1.26342e+08	1.09371e+08	17492039110	18409417850	5901784100	74812632	8.92414e+07	4.37131e+07
	SEM	5.98076e+09	2825159100	8.8209e+08	5.37742e+06	8.41355e+06	1.3366e+07	6.16816e+09	2.68472e+09	17506900	9.03567e+06	2.38525e+07	3.71758e+06
AI2 MODELS
Dataset	Model	Soma V (nm3)		Soma SA (nm2)		Inner Dendrite V (nm3)		Inner Dendrite SA (nm2)		Outer Dendrite V (nm3)		Outer Dendrite SA (nm2)
		A	B	A	B	A	B	A	B	A	B	A	B
Or88a	ai2Model1Morphometrics (Figure 5S_Panel A)	43945600000	28102800000	77576100	63199900	7331790000	2964040000	29218600	16745900	2933450400	621489371	38713930	1.26518e+07
Or88a	ai2Model2Morphometrics (Figure 5S_Panel B)	53717100000	34336300000	83738700	63927200	7683230000	3225290000	32369400	23088400	3215128760	526927200	46653246	10646490
Or88a	ai3Model3Morphometrics (Figure 5_Panel B,C)	46206000000	28228000000	73983400	61622500	6672150000	3015890000	26251400	19225300	2617958348	770195300	4.01791e+07	16228113
	AVE	4.79562e+10	3.02224e+10	7.84327e+07	6.29165e+07	7.22906e+09	3.06841e+09	29279800	1.96865e+07	2.92218e+09	6.39537e+08	4.18488e+07	1.31755e+07
	SEM	2.95342e+09	2.05728e+09	2.8485e+06	680229	2.96359e+08	7.98569e+07	1.76638e+06	1.84539e+06	1.7248e+08	7.08029e+07	2.4392e+06	1.63241e+06
AI3 MODELS
Dataset	Model	Soma V (nm3)			Soma SA (nm2)			Inner Dendrite V (nm3)			Inner Dendrite SA (nm2)			Outer Dendrite V (nm3)			Outer Dendrite SA (nm2)
		A	B	C	A	B	C	A	B	C	A	B	C	A	B	C	A	B	C
Or88a	ai3Model1Morphometrics	61607700000	44949100000	41931700000	115501000	81759100	76922300	7938550000	5262950000	3280910000	27748400	25607900	17448500	2630906700	1375449140	1169442703	33704393	2.67922e+07	21374435
Or88a	ai3Model2Morphometrics	66500500000	42347900000	31507100000	101751000	74769600	66030200	9619380000	7264390000	5600470000	35677500	36708800	27863900	2389674860	1554258550	881878290	3.80048e+07	31365051	16786004
	AVE	64054100000	43648500000	36719400000	108626000	78264350	71476250	8778965000	6263670000	4440690000	31712950	31158350	22656200	2510290780	1464853845	1.02566e+09	3.58546e+07	2.90786e+07	1.90802e+07
	SEM	2.4464e+09	1300600000	5.2123e+09	6.875e+06	3494750	5446050	8.40415e+08	1.00072e+09	1.15978e+09	3964550	5550450	5207700	120615920	89404705	1.43782e+08	2.1502e+06	2.28645e+06	2.29422e+06

## Sheet: Branching Analysis
T1 MODELS
Dataset	Model	Total Branches
		A
Or88a	T1Model1Morphometric	1
Or88a	T1Model2Morphometric	6
Or88a	T1Model3Morphometric	3
Or88a	T1Model4Morphometric	1
	AVE	2.75
	SEM	1.18145
T2 MODELS
Dataset	Model	Total Branches
		A	C (Or88a)
Or47b Ant1	T2Model1Morphometric	1	2
Or47b Ant1	T2Model2Morphometric	1	1
Or47b Ant1	T2Model3Morphometric	1	3
Or47b Ant1	T2Model4IMorphometric	1	2
	AVE	1	2
	SEM	0	0.408248
T3 MODELS
Dataset	Model	Total Branches
		A	B (Or65a)	C (Or88a)
Or47b Ant 2	T3Model1Morphometric	1	1	1
Or47b Ant 2	T3Model2Morphometric	2	1	1
Or47b Ant 2	T3Model3Morphometric	1	1	1
Or47b Ant 2	T3Model4Morphometric	1	1	1
Or88a	T3Model5Morphometric	2	1	2
Or88a	T3Model6Morphometric	1	3	1
Or88a	T3Model7Morphometric	1	1	1
Or88a	T3Model8Morphometric	3	1	4
	AVE	1.5	1.25	1.5
	SEM	0.267261	0.25	0.377964
AC1 MODELS
Dataset	Model	Total Branches
		A	B	C	D
Or88a	ac1Model1Morphometric	1	1	1	1
Or88a	ac1Model2Morphometric	1	1	1	1
Or88a	ac1Model4Morphometric	1	1	1	1
Or88a	ac1Model5Morphometric	1	1	1	1
	AVE	1	1	1	1
	SEM	0	0	0	0
AC3II MODELS
Dataset	Model	Total Branches
		A	B
Ir75c	ac3IIModel1Morphometric	1	3
Ir75c	ac3IIModel2Morphometric	1	2
Ir75c	ac3IIModel3Morphometric	1	5
Ir75c	ac3IIModel4Morphometric	2	2
	AVE	1.25	3
	SEM	0.25	0.707107
AC2 MODELS
Dataset	Model	Total Branches
		A	B	C
Or88a	ac2:4Model1Morphometrics.mod	1	1	1
Or88a	ac2:4Mode2Morphometrics.mod	1	1	1
Or47b(1)	ac2:4Model4Morphometrics.mod	NOT SEGMENTED
	AVE	1	1	1
	SEM	0	0	0
AC4 MODEL
Dataset	Model	Total Branches
		A	B	C
Or47b Ant1	ac2:4Model3Morphometrics.mod	1	1	1
AB1 MODELS
Dataset	Model	Total Branches
		A	B	C	D
Or7a	ab1Model1Morphometric	NOT SEGMENTED
Or7a	ab1Model2Morphometric
AB2 MODELS
Dataset	Model	Total Branches
		A	B
Or7a	ab2A/BModel1Morphometric	312	1
AB3 MODELS
Dataset	Model	Total Branches
		A	B
Or22a	ab3Model1Morphometric	NOT SEGMENTED
Or22a	ab3Model2Morphometric
Or22a	ab3Model3Morphometric
Or22a	ab3Model4Morphometric
Or22a	ab3Mode5Morphometric
Or7a	ab3Model7Morphometrics	83	19
AB4 MODELS
Dataset	Model	Total Branches
		A	B
Or7a	ab4A/BModel1Morphometric	46	14
Or7a	ab4A/BModel2Morphometric	83	19
Or7a	ab4A/BModel3Morphometric	11	5
	AVE	46.6667	12.6667
	SEM	20.7873	4.09607
AB5 MODELS
Dataset	Model	Total Branches
		A	B
Or47a	ab5A/BModel1Morphometric	13	27
Or47a	ab5A/BModel2Morphometric	49	23
Or47a	ab5A/BModel3Morphometric	49	53
Or47a	ab5A/BModel4Morphometric	46	76
	AVE	39.25	44.75
	SEM	8.77852	12.3584
ABX(1) MODELS
Dataset	Model	Total Branches
		A
Ir75c	abx(1)Model3Morphometrics.mod	3
Or7a	abx(1)Model1IMorphometric	9
Or7a	abx(1)Model1IIMorphometric	NOT SEGMENTED
	AVE	6
	SEM	3
ABX(3) MODELS
Dataset	Model	Total Branches
		A	B	C
Or7a	abx(3)Model1Morphometric	CAN'T ASSIGN ID TO ALL BRANCHES
Or22a	abx(3)Model2Morphometric	NOT SEGMENTED
Or56a	abx(3)Model3Morphometric
AI2 MODELS
Dataset	Model	Total Branches
		A	B
Or88a	ai2Model1Morphometrics	5	3
Or88a	ai2Model2Morphometrics	7	3
Or88a	ai3Model3Morphometrics	11	4
	AVE	7.66667	3.33333
	SEM	1.76383	0.333333
AI3 MODELS
Dataset	Model	Total Branches
		A	B	C
Or88a	ai3Model1Morphometrics	14	16	9
Or88a	ai3Model2Morphometrics	18	15	9
	AVE	16	15.5	9
	SEM	2	0.5	0

## Sheet: Mitchondria Analysis
AB1 MODELS
Dataset	Model	Total Mitochondria				Total Mitochondria Volume (um3)				Total Mitochondria Surface Area (um2)
		A	B	C	D	A	B	C	D	A	B	C	D
Or7a	ab1Model1Morphometric	138	103	24	6	4.88098	3.9439	1.29585	0.357254	94.3752	67.6991	22.11	6.4298
Or7a	ab1Model2Morphometric	109	60	28	12	4.9	3.52034	1.52918	0.424718	90.6121	61.3282	29.7129	9.95273
	AVE	123.5	81.5	26	9	4.89049	3.73212	1.41252	0.390986	92.4937	64.5137	25.9115	8.19126
	SEM	14.5	21.5	2	3	0.00950758	0.21178	0.116663	0.0337322	1.88151	3.18546	3.80144	1.76146
AB2 MODELS
Dataset	Model	Total Mitochondria		Total Mitochondria Volume (um3)		Total Mitochondria Surface Area (um2)
		A	B	A	B	A	B
Or7a	ab2A/BModel1Morphometric	125	6	4.71796	0.411565	110.104	6.97429
AB3 MODELS
Dataset	Model	Total Mitochondria		Total Mitochondria Volume (um3)		Total Mitochondria Surface Area (um2)
		A	B	A	B	A	B
Or7a	ab3Model7Morphometric	75	14	3.86035	0.347806	55.6452	7.58393
AB4 MODELS
Dataset	Model	Total Mitochondria		Total Mitochondria Volume (um3)		Total Mitochondria Surface Area (um2)
		A	B	A	B	A	B
Or7a	ab4A/BModel1Morphometric	59	24	1.43015	0.704393	34.9915	14.3917
Or7a	ab4A/BModel2Morphometric	74	9	2.03754	0.442707	43.5366	8.85023
Or7a	ab4A/BModel3Morphometric	54	20	1.58815	0.405166	36.2084	10.8972
	AVE	62.3333	17.6667	1.68528	0.517422	38.2455	11.3797
	SEM	6.00925	4.48454	0.181941	0.0941114	2.66877	1.61777
ABX(1) MODELS
Dataset	Model	Total Mitochondria	Total Mitochondria Volume (um3)	Total Mitochondria Surface Area (um2)
		A	A	A
Or7a	abx(1)Model1IMorphometric	37	1.06874	21.9673
Or7a	abx(1)Model1IIMorphometric	40	0.902069	23.3445
	AVE	38.5	0.985405	22.6559
	SEM	1.5	0.0833352	0.688602
AC1 MODELS
Dataset	Model	Total Mitochondria				Total Mitochondria Volume (um3)				Total Mitochondria Surface Area (um2)
		A	B	C	D	A	B	C	D	A	B	C	D
Or88a	ac1Model1Mito	5	4	3	2	0.602445	0.498429	0.171278	0.221436	13.4144	8.63234	3.10523	3.85946
Or88a	ac1Model2Mito	4	2	1	4	0.847209	0.317381	0.108421	0.424186	16.6897	7.2499	2.24054	6.04537
Or88a	ac1Model4Mito	6	2	1	2	0.352188	0.0153466	0.0808514	0.0819943	9.26829	0.524426	1.83429	1.74542
Or88a	ac1Model5Mito	4	6	1	1	0.204191	0.093528	0.106862	0.0513253	5.10869	2.67782	1.83893	0.935266
	AVE	4.75	3.5	1.5	2.25	0.501508	0.231171	0.116853	0.194735	11.1203	4.77112	2.25475	3.14638
	SEM	0.478714	0.957427	0.5	0.629153	0.141537	0.109691	0.0192119	0.0849693	2.51414	1.90328	0.299057	1.14617
AC1 MODELS
Dataset	Model	Total Mitochondria	Total Mitochondria Volume (um3)	Total Mitochondria Surface Area (um2)
		A	A	A
Or56a	ac1EnlargementModel1Mitochondria	24	1.70173	95.5636
*Only able to segment mitochondria contained in A Neuron ID
Sensillum Class		Soma Volume	Total Mitochondria Number	Total Mitchondria Volume	Total Mitochondria Surface Area	Branch Number	Spike Amplitude Ratio*
Basiconics
ab1	A (Or42b)	69.96 ± 4.14	123.50 ± 14.50	4.89 ± 0.01	92.49 ± 1.88	NA	5.21
	B (Or92a)	60.96 ± 4.11	81.50 ± 21.50	3.73 ± 0.21	64.51 ±3.18	NA	4.53
	C (Gr21a/63a)	52.10 ± 1.00	26.00 ± 2.00	1.41 ± 0.11	25.91 ± 3.80	NA	2.27
	D (Or10a)	28.03 ± 1.69	9.00 ± 3.00	0.39 ± 0.03	8.19 ± 1.76	NA	1
ab2	A (Or59b)	94.69	125	4.72	110.1	312	4.48
	B (Or85a)	34.4	6	0.41	0.97	1	1
ab3	A (Or22a)	59.99	75	3.86	55.65	83	2.77
	B (Or85b)	37.65	14	0.35	7.58	19	1
ab4	A (Or7a)	73.44 ± 3.38	62.33±6.01	1.69 ± 0.18	38.25 ± 2.67	46.67 ± 20.79	2.01
	B (Or56a)	35.22 ± 1.12	17.67±4.48	0.52 ± 0.09	11.38 ± 1.62	12.67 ± 4.10	1
Coeloconics
ac1	A (Rh50/Amt)	23.2 ± 0.55	4.75 ± 0.48	0.50 ± 0.14	11.12 ±2.51	1.00 ± 0.00	NA
	B (Ir92a)	11.56 ± 0.40	3.50 ± 0.96	0.23 ± 0.11	4.77 ± 1.90	1.00 ± 0.00	NA
	C (Ir31a or 75d)	9.62 ± 0.33	1.50 ± 0.50	0.12 ± 0.02	2.25 ± 0.30	1.00 ± 0.00	NA
	D (Ir31a or 75d)	7.92 ± 0.35	2.25 ± 0.63	0.19 ± 0.08	3.15 ± 1.15	1.00 ± 0.00	NA
*Spike Amplitude Ratio sourced from (Zhang et al., 2019)

## Sheet: Summary Table
						Soma Volume (um3)	Soma Surface Area (um2)	ID Volume (um3)	ID Surface Area (um2)	OD Voume (um3)	OD Surface Area (um2)	Total Branches	Total Mitochondria
TRICHOIDS		T1 MODELS (n=4)		at1A	AVE	47.4382	79.2105	5.08397	31.7975	2.58314	36.6963	2.75	NONE SEGMENTED
					SEM	0.954692	2.24599	0.201397	2.14175	0.213359	3.9275	1.18145
		T2 MODELS (n=4)		at2A (Or47b)	AVE	63.4153	92.7028	6.50155	37.6207	2.39574	26.9813	1
					SEM	5.41368	4.53922	0.197352	1.4233	0.210115	1.57337	0
				at2B (Or88a)	AVE	34.9018	65.0662	4.49605	29.6987	0.997003	19.9938	2
					SEM	1.04342	1.44381	0.612831	2.43995	0.0528961	1.2676	0.408248
		T3 MODELS (n=8)		at4A (Or47b)	AVE	67.0976	100.188	7.27575	39.0357	2.75277	30.5504	1.5
					SEM	3.74683	4.09248	0.457027	2.84311	0.37644	2.85454	0.267261
				at4B (Or65a)	AVE	26.1471	54.0102	3.56679	26.5336	1.01586	13.4556	1.25
					SEM	1.18156	1.64722	0.597699	2.72235	0.333236	1.63882	0.25
				at4C (Or88a)	AVE	44.347	83.7311	6.09857	37.2322	1.59175	23.471	1.5
					SEM	3.62559	4.76624	0.570774	2.91655	0.43779	2.85308	0.377964
BASICONICS		AB1 MODELS (n=2)		ab1A	AVE	69.9633	117.761	19.394	63.2151	NONE SEGMENTED			123.5
					SEM	4.13842	1.55187	4.62719	7.02178				14.5
				ab1B	AVE	60.9594	98.2215	21.1535	70.5717				81.5
					SEM	4.10995	3.88545	0.827795	11.397				21.5																								0	0	0	0	0	0	0	0	0	0	0	0	0
				ab1C	AVE	52.1012	105.23	6.72514	29.8376				26																								0	0	0	0	0	0	0	0	0	0	0	0	0
					SEM	1.00044	0.476581	0.629902	1.20167				2
				ab1D	AVE	28.0344	60.9984	2.83355	19.9197				9
					SEM	1.6873	1.17405	0.0135245	1.5345				3
		AB2 MODELS (n=1)		ab2A	AVE	93.6862	131.284	20.0065	63.0084	9.8043	275.421	312	125
				ab2B	AVE	34.4008	68.8937	3.32199	26.7274	0.491549	13.784	1	6
		AB3 MODELS (n=5)		ab3A (Or22a)	AVE	50.3482	98.2703	13.4219	65.6358	6.15348	144.726	83	75
					SEM	2.41867	3.73941	1.1739	5.32766	ONE OD SEGMENTED
				ab3B	AVE	32.9749	87.3002	3.68679	26.9172	1.95046	39.5492	19	14
					SEM	1.48605	6.67751	0.423033	3.4587	ONE OD SEGMENTED
		AB4 MODELS (n=3)		ab4A (Or7a)	AVE	73.4426	101.937	9.43652	32.6028	3.89706	79.8887	46.6667	62.3333
					SEM	3.38308	3.09877	0.633107	2.91399	0.4215	18.3398	20.7873	6.00925
				ab4B (Or56a)	AVE	35.2196	67.719	3.62988	18.8899	1.65024	30.7932	12.6667	17.6667
					SEM	1.11629	4.00769	0.453091	2.49363	0.40295	3.74202	4.09607	4.48454
		AB5 MODELS (n=4)		ab5A (Or47a)	AVE	31.2129	61.5311	3.76751	19.7934	0.980148	27.2505	39.25	NONE SEGMENTED
					SEM	1.15877	3.02166	0.342752	2.045	0.0510809	2.18131	8.77852
				ab5B	AVE	41.1142	72.4534	1.77417	14.697	0.817343	23.772	44.75
					SEM	3.6987	4.73132	0.454074	2.17149	0.163193	4.76707	12.3584
		ABX(1) MODELS (n=3)		abx(1)A	AVE	38.4212	89.8797	7.00047	36.0967	1.2795	20.9471	6	38.5
					SEM	ONE SOMA SEGMENTED		0.738134	3.85385	0.0204977	2.75293	3	1.5
		ABX(3) MODELS (n=3)		abx(3)A	AVE	59.2039	125.35	17.492	74.8126	6.36703	104.023	UNABLE TO ASSIGN ID TO ALL	NONE SEGMENTED
					SEM	5.98076	5.37742	6.16816	9.03567	ONE OD SEGMENTED
				abx(3)B	AVE	53.7925	126.342	18.4094	89.2414	4.89711	48.0179	UNABLE TO ASSIGN ID TO ALL
					SEM	2.82516	8.41355	2.68472	23.8525	ONE OD SEGMENTED
				abx(3)C	AVE	43.7112	109.371	5.90178	43.7131	4.43559	97.8	UNABLE TO ASSIGN ID TO ALL
					SEM	0.88209	13.366	0.0175069	3.71758	ONE OD SEGMENTED
INTERMEDIATES		AI2 MODELS (n=3)		ai2A	AVE	47.9562	78.4327	7.22906	29.2798	2.92218	41.8488	7.66667	NONE SEGMENTED
					SEM	2.95342	2.8485	0.296359	1.76638	0.17248	2.4392	1.76383
				ai2B	AVE	30.2224	62.9165	3.06841	19.6865	0.639537	13.1755	3.33333
					SEM	2.05728	0.680229	0.0798569	1.84539	0.0708029	1.63241	0.333333
		AI3 MODELS (n=2)		ai3A	AVE	64.0541	108.626	8.77896	31.7129	2.51029	35.8546	16
					SEM	2.4464	6.875	0.840415	3.96455	0.120616	2.1502	2
				ai3B	AVE	43.6485	78.2643	6.26367	31.1583	1.46485	29.0786	15.5
					SEM	1.3006	3.49475	1.00072	5.55045	0.0894047	2.28645	0.5
				ai3C	AVE	36.7194	71.4762	4.44069	22.6562	1.02566	19.0802	9
					SEM	5.2123	5.44605	1.15978	5.2077	0.143782	2.29422	0
COELOCONICS		AC1(EnID) MODELS (n=1)		ac1A	AVE	53.2392	75.0258	12.7567	29.7851	NONE SEGMENTED			24
					SEM
				ac1B	AVE	17.1843	47.8269	1.76616	15.7235				NONE SEGMENTED
					SEM
				ac1C	AVE	15.7784	42.5332	1.49433	16.7639
					SEM
				ac1D	AVE	12.9225	37.6704	1.21601	15.2975
					SEM
		AC1 MODELS (n=4)		ac1A	AVE	23.2017	46.9821	1.37848	9.9564	0.620042	7.94946	1	4.75
					SEM	0.545867	0.918338	0.0813537	0.871566	0.0351805	0.4334	0	0.478714
				ac1B	AVE	11.5628	32.0204	0.836845	8.46578	0.130654	3.71683	1	3.5
					SEM	0.39726	1.2857	0.0138471	0.267277	0.00741693	0.146822	0	0.957427
				ac1C	AVE	9.6163	26.0318	0.54431	5.28887	0.128816	3.82703	1	1.5
					SEM	0.33464	0.615373	0.0281716	0.202275	0.00584029	0.110582	0	0.5
				ac1D	AVE	7.9181	25.0797	0.668899	8.53977	0.197943	4.65327	1	2.25
					SEM	0.352013	1.5028	0.0436347	0.919268	0.0131573	0.133266	0	0.629153
		AC2 MODELS (n=3)		ac2A	AVE	26.6858	64.4553	3.07842	20.4143	0.364554	7.36325	1	NONE SEGMENTED
					SEM	1.47705	4.80792	0.99693	5.8939	0.023398	0.315275	0
				ac2B	AVE	24.0518	54.3282	2.06867	14.8697	0.47733	8.58549	1
					SEM	0.809868	1.48036	0.0603595	0.847434	0.0530195	0.335395	0
				ac2C	AVE	15.4219	40.3205	1.54952	11.5401	0.26242	6.41466	1
					SEM	0.579798	4.12082	0.218041	1.35747	0.0533255	0.72925	0
		AC3II MODELS (n=4)		ac3IIA (Ir75c)	AVE	41.2709	99.5216	3.74599	26.5333	0.912362	12.1786	1.25
					SEM	5.65078	6.22133	0.359009	1.84038	0.0663126	0.493976	0.25
				ac3IIB	AVE	23.4883	60.4421	3.02404	24.9629	0.59276	11.0123	3
					SEM	1.30217	3.69725	0.432218	2.46694	0.107943	1.14546	0.707107
		AC4 MODELS (n=1)		ac4A	AVE	38.3009	64.6171	1.99396	11.7645	0.241821	5.1708	1
												0
				ac4B	AVE	31.9867	59.0742	2.72275	15.8938	0.473087	7.43861	1
												0
				ac4C	AVE	17.9181	39.6003	1.6246	10.6512	0.245665	5.01296	1
												0
[truncated: 5 more columns]
