# Supplementary figures and images for: Systematic morphological and morphometric analysis of identified olfactory receptor neurons in Drosophila melanogaster
Source: eLife journal article supplement (doi:10.7554/elife.69896), 2021-08-23

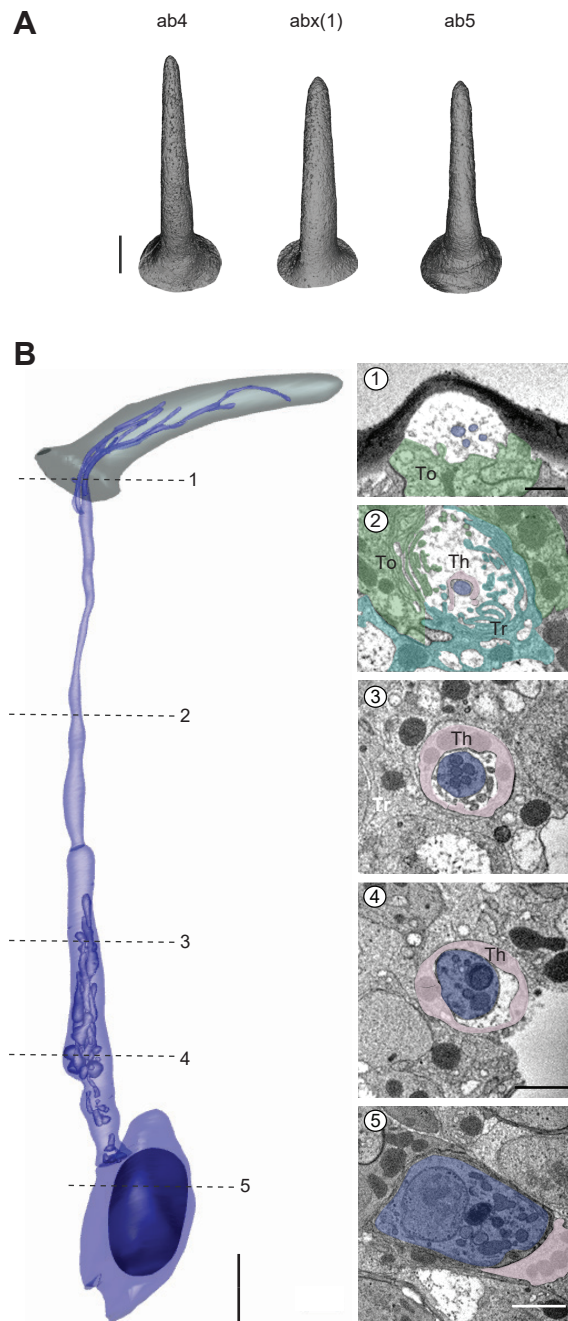

Figure 8 figure supplement 1

Supplement: supp [file elife-69896-supp-v1.zip]

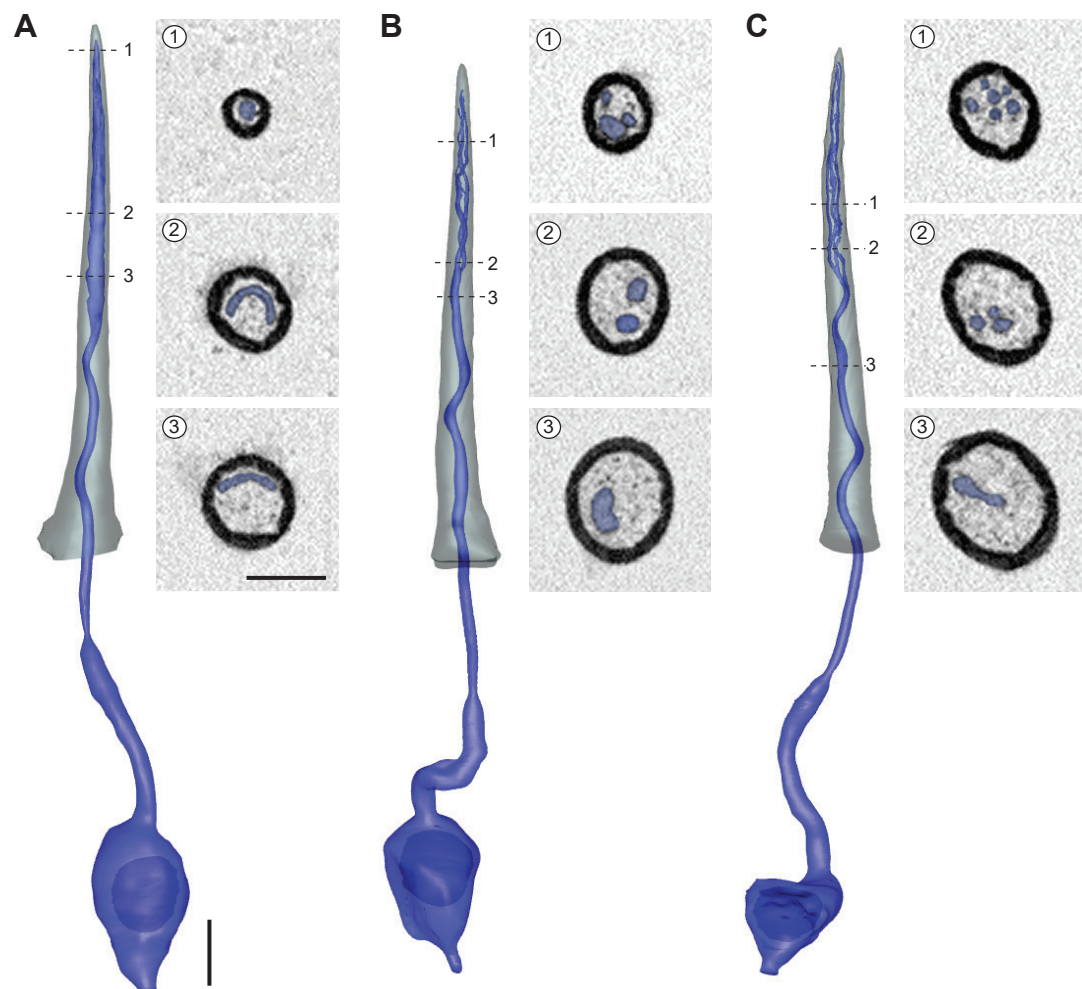

Figure 2-figure supplement 1

Supplement: supp [file elife-69896-supp-v1.zip]

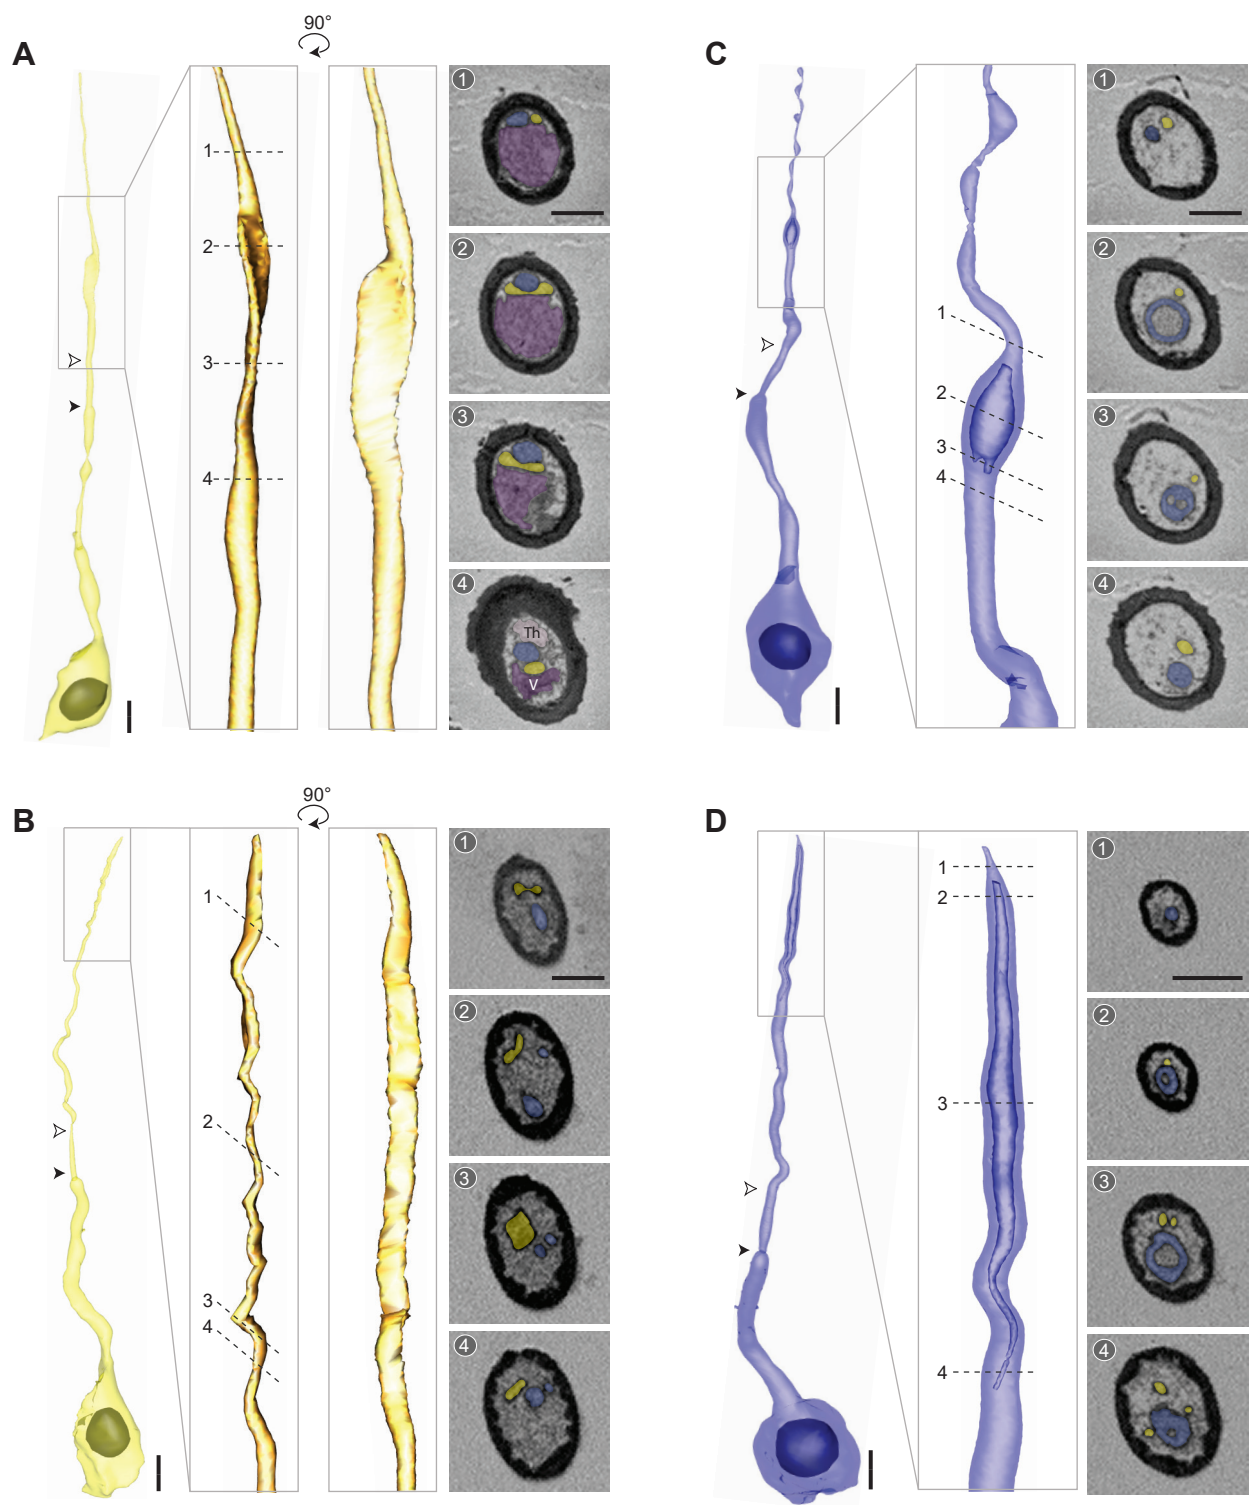

Figure 3 figure supplement 2

Supplement: supp [file elife-69896-supp-v1.zip]

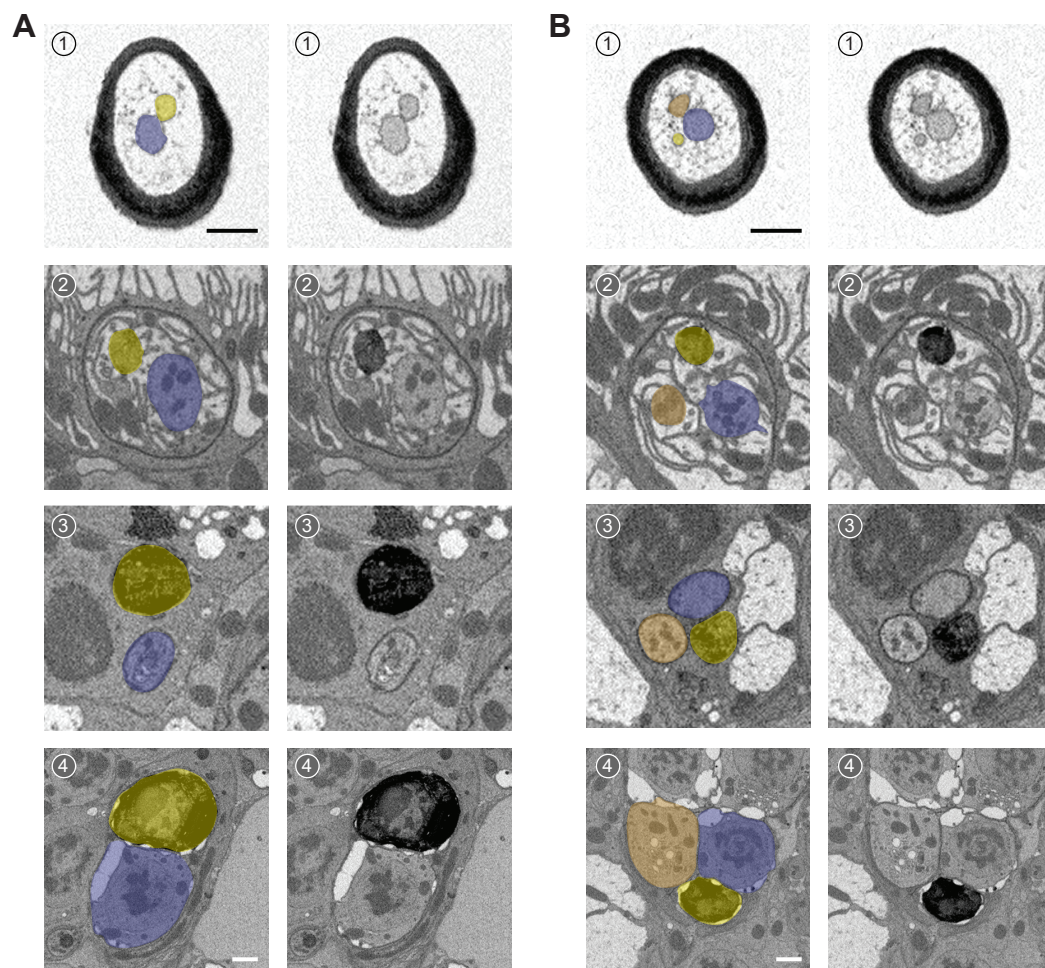

Figure 3 figure supplement 1

Supplement: supp [file elife-69896-supp-v1.zip]

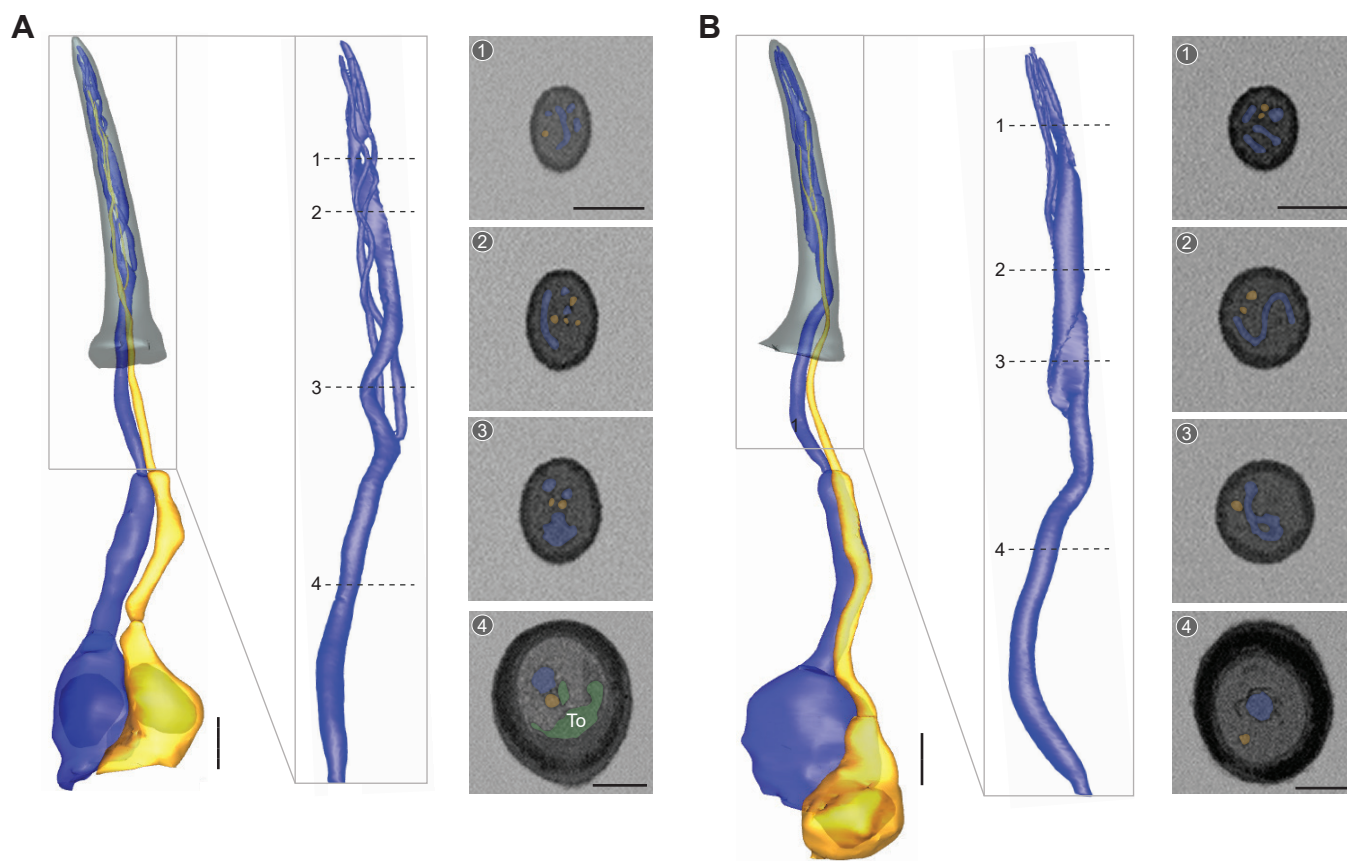

Figure 5 figure supplement 1

Supplement: supp [file elife-69896-supp-v1.zip]

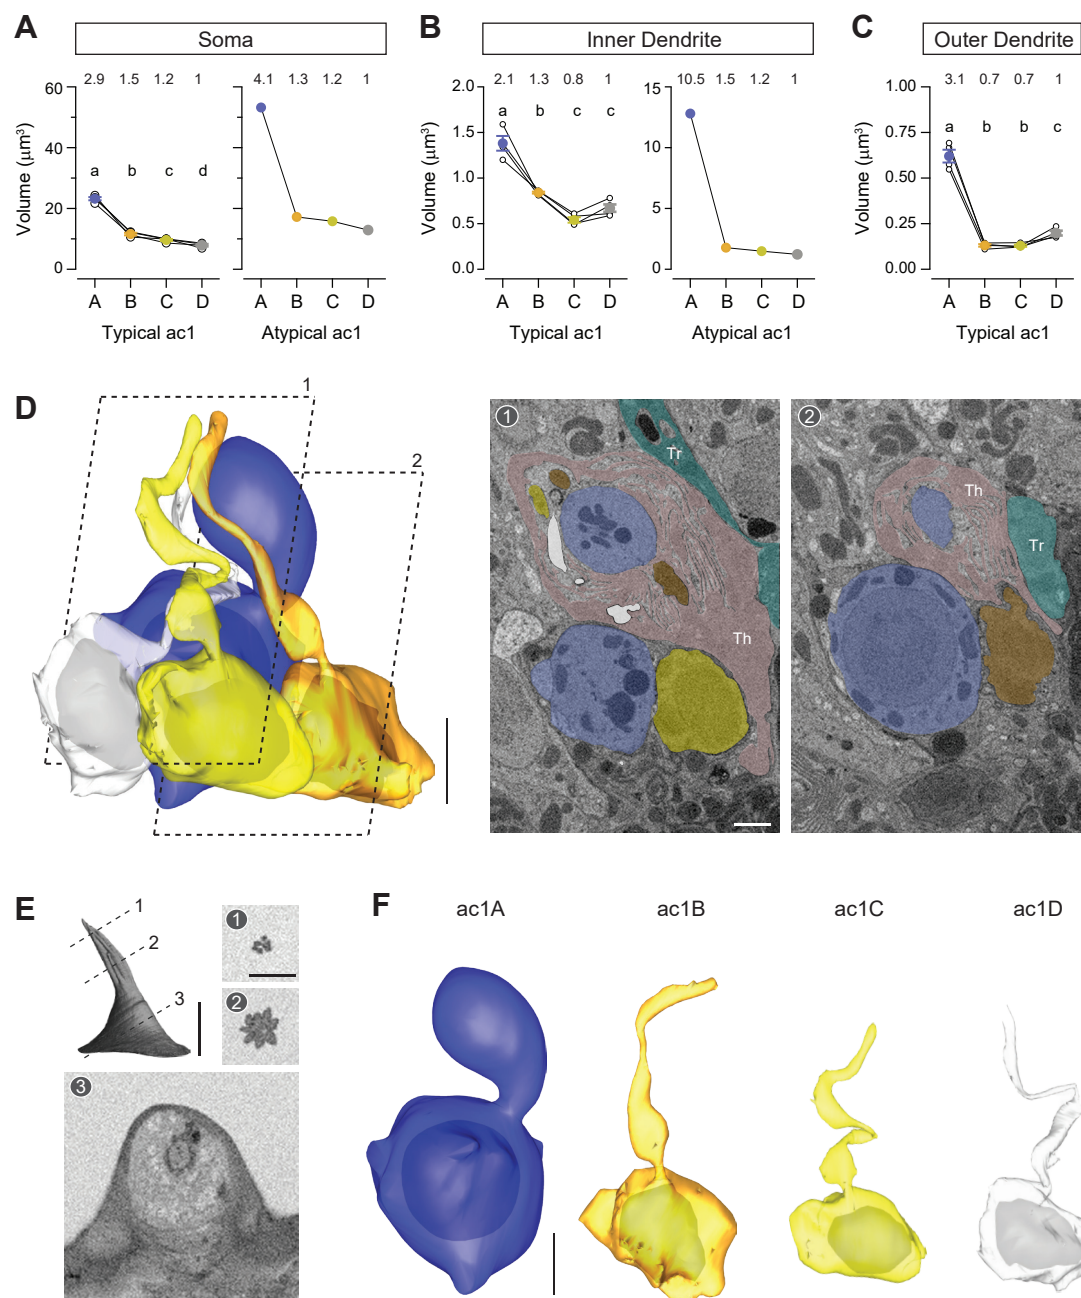

Figure 4 figure supplement 1

Supplement: supp [file elife-69896-supp-v1.zip]
